1 **Title:** Temperature drives variation in flying insect biomass across a German malaise trap  
2 network

3 **Running head:** Insect biomass over ecological gradients

4 **Authors:** Ellen A.R. Welti<sup>1\*</sup>, Petr Zajicek<sup>1</sup>, Manfred Ayasse<sup>2</sup>, Tim Bornholdt<sup>3</sup>, Jörn Buse<sup>4</sup>,  
5 Frank Dziocck<sup>5</sup>, Rolf A. Engelmann<sup>6,7</sup>, Jana Englmeier<sup>8</sup>, Martin Fellendorf<sup>2</sup>, Marc I. Förchler<sup>4</sup>,  
6 Mark Frenzel<sup>9</sup>, Ute Fricke<sup>10</sup>, Cristina Ganuza<sup>10</sup>, Mathias Hippke<sup>11</sup>, Günter Hoenselaar<sup>12</sup>, Andrea  
7 Kaus-Thiel<sup>13</sup>, Klaus Mandery<sup>14</sup>, Andreas Marten<sup>15</sup>, Michael T. Monaghan<sup>16,17</sup>, Carsten Morkel<sup>12</sup>,  
8 Jörg Müller<sup>8</sup>, Stephanie Puffpaff<sup>18</sup>, Sarah Redlich<sup>10</sup>, Ronny Richter<sup>6,7,19</sup>, Sandra Rojas Botero<sup>20</sup>,  
9 Tobias Scharnweber<sup>21</sup>, Gregor Scheiffarth<sup>22</sup>, Paul Schmidt Yáñez<sup>16</sup>, Rhena Schumann<sup>23,24</sup>,  
10 Sebastian Seibold<sup>25,26</sup>, Ingolf Steffan-Dewenter<sup>10</sup>, Stefan Stoll<sup>27</sup>, Cynthia Tobisch<sup>28</sup>, Sönke  
11 Twietmeyer<sup>29</sup>, Johannes Uhler<sup>8</sup>, Juliane Vogt<sup>20</sup>, Dirk Weis<sup>30</sup>, Wolfgang W. Weisser<sup>20</sup>, Martin  
12 Wilmking<sup>21</sup>, Peter Haase<sup>1,31</sup>

13 **Author affiliations:**

14 <sup>1</sup> Department of River Ecology and Conservation, Senckenberg Research Institute and Natural  
15 History Museum Frankfurt, Gelnhausen 63571 Germany

16 <sup>2</sup> Institute of Evolutionary Ecology and Conservation Genomics, Ulm University, Ulm 89075  
17 Germany

18 <sup>3</sup> Lower Oder Valley National Park, Schwedt/Oder, OT Criewen 16303 Germany

19 <sup>4</sup> Black Forest National Park, Freudenstadt 72250 Germany

20 <sup>5</sup> Animal Ecology, University of Applied Sciences HTW Dresden, Pillnitzer Platz 2, Dresden  
21 01326 Germany

22 <sup>6</sup> German Centre for Integrative Biodiversity Research (iDiv), Halle-Jena-Leipzig, Leipzig 04103  
23 Germany

24 <sup>7</sup> Systematic Botany and Functional Biodiversity, Institute for Biology, Leipzig University,  
25 Berlin 04103 Germany

26 <sup>8</sup> Ecological Field Station, University of Würzburg, Rauhenebrach 96181 Germany

27 <sup>9</sup> Community Ecology, Helmholtz Centre for Environmental Research, Halle 06120 Germany

28 <sup>10</sup> Animal Ecology and Tropical Ecology, Biocenter, University of Würzburg, Würzburg 97074  
29 Germany

30 <sup>11</sup> Biosphärenreservatsamt Schaalsee-Elbe, Zarrentin am Schaalsee 19246 Germany

31 <sup>12</sup> Kellerwald-Edersee National Park, Bad Wildungen 34537 Germany

32 <sup>13</sup> Hunsrück-Hochwald National Park, Birkenfeld 55765 Germany

33 <sup>14</sup> Institut für Biodiversitätsinformation e.V., Ebern 96106 Germany

34 <sup>15</sup> Harz National Park, Wernigerode 38855 Germany

35 <sup>16</sup> Leibniz Institute of Freshwater Ecology and Inland Fisheries (IGB), Berlin 12587 Germany

36 <sup>17</sup> Institut für Biologie, Freie Universität Berlin, 14195 Germany

37 <sup>18</sup> Nationalparkamt Vorpommern, Born a. Darß 18375 Germany

38 <sup>19</sup> Geoinformatics and Remote Sensing, Institute for Geography, Leipzig University, Leipzig  
39 04103 Germany

40 <sup>20</sup> Restoration Ecology Research Group, Department of Ecology and Ecosystem Management,  
41 Technical University of Munich, Freising 85354 Germany

42 <sup>21</sup> Institute for Botany and Landscape Ecology, University Greifswald, Greifswald 17489  
43 Germany

44 <sup>22</sup> Lower Saxon Wadden Sea National Park Authority, Wilhelmshaven 26382 Germany

45 <sup>23</sup> Biological Station Zingst, University of Rostock, Zingst 18374 Germany

46 <sup>24</sup> Mathematics and Natural Sciences, Institute of Biological Science, University of Rostock,  
47 Rostock 18059 Germany

48 <sup>25</sup> Ecosystem Dynamics and Forest Management Research Group, Technical University of  
49 Munich, Freising 85354 Germany

50 <sup>26</sup> Berchtesgaden National Park, Berchtesgaden 83471 Germany

51 <sup>27</sup> Environmental Planning and Technology, University of Applied Sciences Trier,  
52 Environmental Campus Birkenfeld, Birkenfeld 55761 Germany

53 <sup>28</sup> Institute for Ecology and Landscape, Weihenstephan University of Applied Sciences, Freising  
54 85354 Germany

55 <sup>29</sup> Eifel National Park, Schleiden-Gemünd 53937 Germany

56 <sup>30</sup> Biosphärenreservat Oberlausitzer Heide- und Teichlandschaft, Malschwitz OT Wartha 02694  
57 Germany

58 <sup>31</sup> Faculty of Biology, University of Duisburg-Essen, Essen, Germany

59 \*corresponding author, email: [ellen.welti@senckenberg.de](mailto:ellen.welti@senckenberg.de)

60

61 **ABSTRACT**

- 62       **1)** Among the many concerns for biodiversity in the Anthropocene, recent reports of flying  
63       insect loss are particularly alarming, given their importance as pollinators and as a food  
64       source for many predators. Few insect monitoring programs cover large spatial scales  
65       required to provide more generalizable estimates of insect responses to global change  
66       drivers.
- 67       **2)** We ask how climate and surrounding habitat affect flying insect biomass and day of peak  
68       biomass using data from the first year of a new standardized distributed monitoring  
69       network at 84 locations across Germany comprising spatial gradient of land-cover types  
70       from protected to urban areas.
- 71       **3)** Flying insect biomass increased linearly with monthly temperature across Germany.  
72       However, the effect of temperature on flying insect biomass flipped to negative in the hot  
73       months of June and July when local temperatures most exceeded long-term averages.
- 74       **4)** Land-cover explained little variation in insect biomass, but biomass was lowest in  
75       forested sites. Grasslands, pastures and orchards harbored the highest insect biomass. The  
76       date of peak biomass was primarily driven by surrounding land-cover type, with  
77       grasslands especially having earlier insect biomass phenologies.
- 78       **5)** Standardized, large-scale monitoring is pivotal to uncover underlying processes of insect  
79       decline and to develop climate-adapted strategies to promote insect diversity. In a  
80       temperate climate region, we find that the benefits of temperature on flying insect  
81       biomass diminish in a German summer at locations where temperatures most exceeded  
82       long-term averages. These results highlighting the importance of local adaptation in  
83       climate change-driven impacts on insect communities.

84

85 **Keywords:** ecological gradients, climate change, land-cover, insect monitoring, malaise trap,  
86 pollinator, thermal performance, LTER

87

## 88 INTRODUCTION

89 Insects constitute much of terrestrial biodiversity and deliver essential ecosystem services such  
90 as pollination of the majority of wild plants and 75% of crop species (Losey & Vaughan, 2006;  
91 Vanbergen & Insect Pollinators Initiative, 2013). Insect biomass is a key constituent of energy  
92 flows in many food webs (Stepanian et al., 2020), a useful measure of whole insect communities  
93 (Shortall et al., 2009) and an indicator of ecosystem function (Barnes et al., 2016; Dangles et al.,  
94 2011). Climate change and anthropogenically-altered land-cover are likely drivers of insect  
95 declines, but their effects on insect biomass are still poorly characterized (Habel et al., 2019).  
96 Amidst burgeoning evidence of widespread insect declines, standardized, and large scale insect  
97 monitoring is needed to improve estimates of trends, and identify drivers (Didham et al., 2020;  
98 Wagner, 2020).

99 Climate change is geographically pervasive (Wilson & Fox, 2020) and may explain  
100 insect decline in natural areas (e.g. Janzen & Hallwachs, 2019; Welti, Roeder, et al., 2020).  
101 Some insect taxa are benefiting from rising temperatures, which can increase local populations  
102 (Baker et al., 2021) and range sizes (Termaat et al., 2019). However, as temperatures continue to  
103 rise and increase more rapidly, negative impacts on insect productivity are expected (Warren et  
104 al., 2018). This relationship is predicted by thermal performance theory, which hypothesizes that  
105 insect fitness, as measured by biomass or other performance indicators, will have a unimodal  
106 response to temperature (Kingsolver & Huey, 2008; Sinclair et al., 2016).

107 Responses of precipitation regimes to climate change vary with region, but forecasts  
108 generally suggest increased frequency of both heavy precipitation events and droughts (Myhre et  
109 al., 2019). High precipitation increases insect mortality and shortens the period of time insects  
110 are flying (Totland, 1994). Indirect effects of precipitation on flying insects mediated by plants

111 (e.g. altering plant phenology or plant nutrition) are context-dependent but increasing rainfall in  
112 average to wet climates is often detrimental (Lawson & Rands, 2019).

113 Changing land-cover due to human activities is additionally a major threat to insects  
114 (Wagner, 2020), causing loss of resources and nesting locations at local scales, to fragmented  
115 habitats at larger scales (Newbold et al., 2020). Heavily human-modified landscapes come with  
116 associated pressures, such as eutrophication and pesticide use with agricultural intensification  
117 (Carvalho et al., 2020; Goulson et al., 2018), and urban light pollution (Owens et al., 2020),  
118 reducing both insect diversity (Fenoglio et al., 2020; Piano et al., 2020), and biomass (Macgregor  
119 et al., 2019; Svenningsen et al., 2020).

120 Here we ask how climate and land-cover affect flying insect biomass across the growing  
121 season and 84 locations ranging over 7° latitude during the first year of monitoring (2019) of the  
122 German Malaise Trap Program. We hypothesize (**H1**) the effect of temperature on insect  
123 biomass will **a)** be unimodal, and **b)** decline at locations where local temperatures with the  
124 greatest increase above long-term averages. We hypothesize (**H2**) that flying insect biomass will  
125 decline with increasing precipitation due to reduced flying activity. Finally, we predict (**H3**)  
126 flying insect biomass will be lower in land-cover types with larger anthropogenic impacts such  
127 as urban and agricultural areas. We additionally conducted an exploratory analysis to see if the  
128 date of peak biomass varied with climate, land-cover type, or elevation and to examine if  
129 identified significant environmental drivers of insect biomass were the result of co-variation with  
130 biomass phenology (e.g. if positive predictors resulted in capturing a phenological interval with  
131 higher biomass). The broad spatial coverage allows us to examine drivers of flying insect  
132 biomass using a macroecological gradients approach (Peters et al., 2019; Pianka, 1966).

133

134 **METHODS**

135 *German Malaise Trap Program*

136 The German Malaise Trap Program currently comprises 31 German Long-Term Ecological  
137 Research (LTER-D) and National Natural Landscape sites ([https://www.ufz.de/lter-](https://www.ufz.de/lter-d/index.php?de=46285)  
138 [d/index.php?de=46285](https://www.ufz.de/lter-d/index.php?de=46285)). The program was established in early 2019 to investigate long-term  
139 trends in flying insect biomass and species composition using DNA metabarcoding. In each site,  
140 one to six locations were selected and one malaise trap was installed per location. All traps  
141 measured 1.16 m<sup>2</sup> on each side (Fig. S1). We examine here the 2019 biomass data retrieved from  
142 25 of the 31 sites; the remaining sites began sampling in 2020 and are not analyzed in this study.  
143 To fill spatial gaps, we included 8 sites in Bavaria from an additional project using the same  
144 malaise trap type and measurement methods. Overall, this study includes 1039 samples from 84  
145 locations and 33 participating sites distributed across Germany (Fig. 1; Table S1). Traps ran from  
146 early April to late October 2019 and were usually emptied every two weeks (14.03 days  $\pm$  0.06  
147 SE; ranging 7-29 days). Some traps ran for shorter durations and several samples were lost due  
148 to animal or wind damage. By sampling across all times of day for the duration of the growing  
149 season, these data represent a wide variety of flying insect taxa across a large range of seasonal  
150 and diurnal flight periodicity.

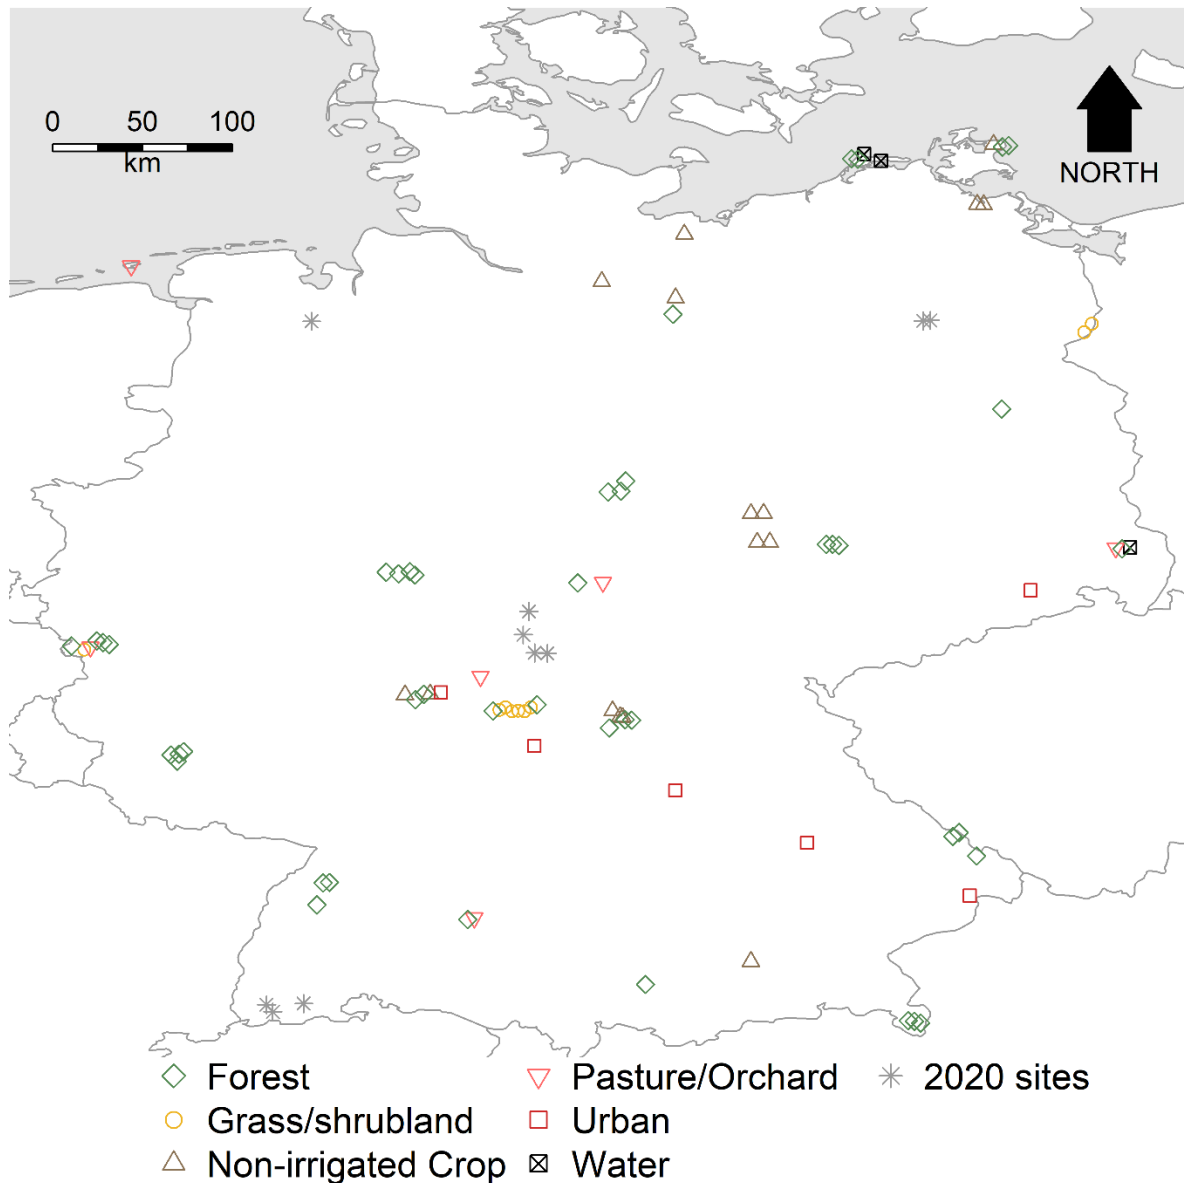

**Figure 1.** Malaise trap locations where samples were collected beginning in 2019 are identified by the dominant land-cover in the surrounding 1 km. Points coded as stars indicate trap locations at which sampling began in 2020 and are incorporated to show the full extent of the current program but are not included in the analyses. Overlapping locations were jittered longitudinally to improve visualization.

158 *Lab procedures*

159 Insect biomass was wet weighed to preserve samples for future identification. Alcohol was  
160 filtered in a stainless steel sieve (0.8 mm mesh width) following the procedure in Hallmann et al.  
161 (2017), with one modification: instead of waiting until alcohol drops occurred >10 seconds apart,  
162 samples were filtered for a standard five minutes prior to weighing to the nearest 0.01g.

163

164 *Climate*

165 Monthly means of maximum and minimum temperatures, and monthly cumulative precipitation  
166 (henceforth tmax, tmin, and precipitation) were extracted from each location from 2019 using the  
167 Terraclimate dataset (Abatzoglou et al., 2018), and from 1960-2018 using the CRU-TS 4.03  
168 dataset (Harris et al., 2014) downscaled with WorldClim 2.1 (Fick & Hijmans, 2017). Data from  
169 both time periods (2019 and 1960-2018) were not available from either dataset alone. Both  
170 datasets have spatial resolutions of 2.5 arc minutes (~21 km<sup>2</sup>) with our 84 trap locations  
171 occurring in 72 separate climate grid cells.

172 Tmax and tmin in 2019 were higher than 1960-2018 averages, especially during summer  
173 months (Fig. 2a) and were highly correlated ( $R^2 = 0.97$ ). Therefore, we used only tmax in our  
174 analyses. Annual precipitation was slightly lower in 2019 (784 mm  $\pm$  32 SE) relative to the  
175 1960-2018 average (842 mm  $\pm$  32 SE), with summer months comprising the driest period, but  
176 high variation existed across months (Fig. 2b). No latitudinal temperature gradient existed across  
177 our sampling locations in 2019 (Fig. S2a) or long-term averages (Fig. S2b), likely due to a  
178 negatively correlation between elevation and latitude (Fig. S3). However, southern latitudes in



179 2019 experienced temperatures exceeding long-term averages to a greater degree than northern  
180 latitudes (Fig. S2c) and had higher precipitation (Fig. S2d).

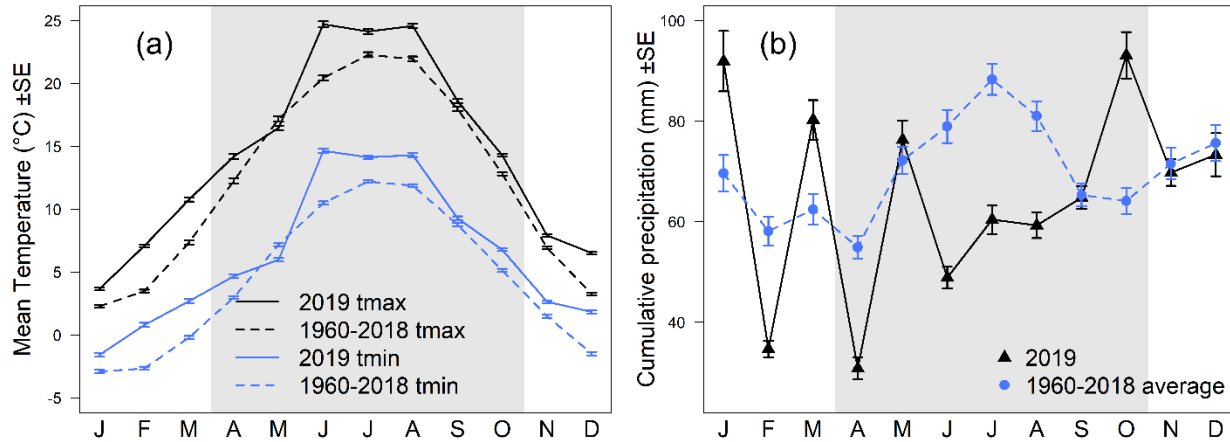

181  
182 **Figure 2.** Comparison of climate at the 84 trap locations between 2019 and long-term average  
183 (1960-2018) including the average maximum monthly temperatures (tmax) and minimum  
184 monthly temperatures (tmin) in °C ± standard error (a) and cumulative monthly precipitation in  
185 mm ± standard error (b). Period of the year in which malaise trap sampling occurred is shaded in  
186 grey.

187

### 188 *Land-cover*

189 Land-cover categories in a 1-km buffer around each location were extracted using the 2018  
190 CORINE dataset (European Union, Copernicus Land Monitoring Service, 2018). Previous work  
191 suggests that at scales larger than 1-km, insects have weaker responses to land-cover buffers  
192 (Seibold et al., 2019). The 30 CORINE land-cover types were pooled into eight categories: urban  
193 (7.5% of surrounding land-cover), intensive agriculture (2.3%), non-irrigated agriculture  
194 (15.9%), pasture/orchard (12.7%), forest (44.7%), grassland/shrubland (12.1%), freshwater  
195 (3.9%), and saltwater (0.9%).

196

197 ***Elevation***

198 Elevation (m above sea level) was extracted using the Digital Terrain Model with 200-m grid  
199 widths (DGM200) from the German Federal Agency for Cartography and Geodesy (GeoBasis-  
200 DE / BKG, 2013). Elevation varied from 0 m on a barrier island in northeast Germany, to 1413  
201 m in the German Alps.

202 All GIS data extraction was conducted in QGIS ver. 3.14 (QGIS.org, 2020).

203

204 ***Model selection***

205 To identify drivers of insect biomass, we used an Akaike Information Criterion corrected for  
206 small sample sizes (AIC<sub>c</sub>) framework (Burnham & Anderson, 2003); first building an *a priori*  
207 full model, comparing AIC<sub>c</sub> of models with and without spatial autocorrelation to test for spatial  
208 non-independence, and then comparing all possible reduced models of fixed effects using the  
209 *dredge* function in the R package “MuMIn” (Bartoń, 2016). Mixed models were fit using the R  
210 package “lme4” (Bates et al., 2015). All analyses were conducted in R ver. 4.0.3 (R Core Team,  
211 2020). To reduce variance inflation due to land-cover categories being percentages, we removed  
212 land-cover categories from the model starting with the least common until the variance inflation  
213 factor (VIF) was <10 (Montgomery et al., 2021); this removed the land-cover types of  
214 freshwater, intensive agriculture, and saltwater. VIF was calculated using the “car” package in  
215 program R (Fox & Weisberg, 2019). Initial analyses substituting the Land Use Index (LUI;  
216 Büttner, 2014) for land-cover percentages resulted in no top models containing LUI. We  
217 included the 2<sup>nd</sup> degree polynomial of the sampling period to capture the season pattern of

218 biomass. Sampling period refers to the half-month period most overlapping trap sampling days,  
219 and is numerical (e.g. first half of April = sampling period 1). Tmax and precipitation predictors  
220 correspond to the month in which the majority of sampling days occurred. Tmax was first  
221 included as a second order polynomial; however while all top models included the fixed effect of  
222 “poly(tmax,2)”, the second order polynomial term of tmax was never significant; thus we  
223 replaced this parameter with a linear “tmax” term. We initially wished to include the 2019  
224 temperatures minus the long-term average ( $\Delta$  temp) as a driver, but this variable caused inflation  
225 with sampling period and thus was excluded. Precipitation and elevation were scaled by dividing  
226 by 100.

227         The full model contained the response variable of sample biomass in mg/day all 84  
228 locations and was  $\log_{10}(x+1)$  transformed to correct for a log-skewed distribution. Fixed  
229 predictors of tmax, precipitation, elevation, % cover of the five most dominant land-cover  
230 categories, the 2<sup>nd</sup> degree polynomial of sampling period (poly(period,2)), and a random effect of  
231 trap location to account for repeated observations. We tested five models fitting spatial  
232 autocorrelation (exponential, Gaussian, linear, rational quadratic, and spherical correlation) and  
233 compared their AIC<sub>c</sub> values with a model without a spatial correlation argument (Zuur et al.,  
234 2009). The model with the lowest AIC<sub>c</sub> was the model without a spatial autocorrelation term;  
235 thus we proceeded with this model when selecting for fixed effects. Models with a  $\Delta$ AIC<sub>c</sub> < 2 are  
236 considered parsimonious (Burnham & Anderson, 2003) and reported.

237

238 ***Temperature variation***

239 We wished to further examine our hypothesis that the effects of temperature on flying insect  
240 biomass would decrease when local temperatures exceeded long-term averages, and examine  
241 how responses varied across sampling months. We were prohibited from including  $\Delta\text{temp}$  (the  
242 deviation in monthly maximum temperatures from long-term averages) in the mixed model due  
243 to high variance inflation with sampling period. With the aim of reduce complexity due to  
244 variation in timing of sample collection across locations, and eliminate repeated sampling within  
245 a location/month, we calculated an average value of biomass (mg/day) per location and month by  
246 computing a monthly weighted average of insect biomass. Our calculation assumes traps caught  
247 the same amount of biomass each day within a sample and allocates sample biomass to each  
248 month weighed by the number of sampling days (e.g. for a trap run with 1 day in month A and  
249 13 days in month B we assumed  $1/14^{\text{th}}$  of the biomass was collected in month A and  $13/14^{\text{th}}$  was  
250 in month B). With these assumptions, the average biomass  $B_{ij}$  (mg/day) of location  $i$  in month  $j$   
251 is a weighted average of the  $n$  samples occurring in the month according to the following  
252 formula:

253 **Eq. 1**

$$254 \quad B_{i,j} = \frac{\sum_{k=1}^n (b_{ijk} \times D_{k,j} \div D_k)}{\sum_{k=1}^n D_{k,j}}$$

255 Where  $b_{ijk}$  = the total biomass (mg) at location  $i$  occurring at least partially in month  $j$  for a  
256 sample  $k$ ,  $n$  = the total number of samples occurring at least partially in month  $j$  for location  $i$ ,  $D_{k,j}$   
257 = the number of sampling days occurring in month  $j$  for a given sample  $k$ ,  $D_k$  = the total number  
258 of sampling days for a given sample  $k$

259 For each month (April- October), we then tested for an interaction between monthly  $t_{\text{max}}$   
260 and  $\Delta \text{temp}$  (2019  $t_{\text{max}}$  minus the long-term average  $t_{\text{max}}$ ) for the corresponding location/month

261 on log<sub>10</sub> transformed  $B_{i,j}$ . We visualized the results using the R package “effects” (Fox &  
262 Weisberg, 2019).

263

#### 264 ***Dominant land-cover categories***

265 To visualize changes in flying insect biomass with land-cover, we plotted biomass/day over  
266 median day of sampling for locations corresponding to each dominant land-cover. Dominant  
267 land cover refers to the land cover type with the highest percentage in the 1 km buffer  
268 surrounding each location. The AIC<sub>c</sub> analysis is our primary test of differences in biomass  
269 between land-cover types and uses land cover percentages rather than dominant land covers.  
270 However, we additionally used Welch’s t-tests to identify significant differences between  
271 log<sub>10</sub>(x + 1) transformed  $B_{i,j}$  for all locations, and locations corresponding to each dominant  
272 land-cover within each month. No locations had surroundings dominated by intensive  
273 agriculture. Locations dominated by saltwater (n=1) and freshwater (n=2) were excluded due to  
274 low replication.

275

#### 276 ***Peak biomass***

277 To calculate the day of the year of peak biomass, we fit splines on the relationship between  
278 biomass (mg/day) of each sample and the median day of the year of each sample for each  
279 location using the “smooth.spline” function in program R. We then extracted the day of the year  
280 when the maximum value of the fitted spline occurred (see Fig. S4 for an example). We excluded  
281 locations where the maximum extracted value occurred at either end of the sampling interval,  
282 assuming these sampling locations may not have captured the peak biomass date; in total we

283 were able to calculate peak biomass date for 73 locations. We then followed the same AIC<sub>c</sub>  
284 model selection procedure as was used for determining drivers of insect biomass to conduct  
285 model selection on drivers of peak biomass. The full *a priori* model was a linear regression  
286 which included the response variable of peak biomass date, and the response variables of the  
287 average monthly 2019 tmax from the beginning of the year (January) to the last main sampling  
288 month (October), the average Δtemp (2019 tmax minus long-term tmax) from January to  
289 October, the cumulative precipitation from January to October, elevation, and the % cover of the  
290 five most dominant land-cover categories. Precipitation and elevation were scaled by dividing by  
291 100.

292

## 293 **RESULTS**

294 Mean flying insect biomass averaged  $2,329 \pm 79$  SE mg/day and varied from >10 to 17,543  
295 mg/day. Biomass increased from  $734 \pm 98$  SE mg/day in early April, to a peak of  $5,356 \pm 401$  SE  
296 mg/day in late June, declining to  $568 \pm 111$  SE mg/day in late October. AIC<sub>c</sub> model comparison  
297 selected two competing top models (Table S2) with both containing tmax, percent forest cover,  
298 and sampling period, then second model additionally containing elevation as predictors of flying  
299 insect biomass (Table 1). The top model explained 43-45% of the variance in flying insect  
300 biomass without location information (marginal R<sup>2</sup>) and 73% of flying insect biomass was  
301 accounted for when including the random effect of location identity (conditional R<sup>2</sup>; Table S2).

302

303 **Table 1. Top AIC<sub>c</sub> models.** AIC<sub>c</sub> model selection for predictors of flying insect biomass  
304 resulted in two top models (a & b). See Table S2 for AIC<sub>c</sub> parameters. Both models include the

305 random variable of trap location. T-tests use Satterthwaite’s method. Poly(period,1) and  
 306 poly(period,2) indicate the first and second order terms of the 2<sup>nd</sup> degree polynomial for  
 307 sampling period respectively. Other predictor variables include the percent forest in a  
 308 surrounding 1 km buffer (%forest) and monthly maximum temperature (tmax). Model  
 309 characteristics include estimate (Est), standard error (SE), degrees of freedom (df), t-value, and  
 310 p-value (*P*).

|                    | Est    | SE    | df  | t-value | <i>P</i> |
|--------------------|--------|-------|-----|---------|----------|
| <b>a.) Model 1</b> |        |       |     |         |          |
| Intercept          | 2.278  | 0.122 | 952 | 18.73   | < 0.001  |
| %forest            | -0.319 | 0.109 | 82  | -2.93   | 0.0043   |
| poly(period,1)     | -4.124 | 0.329 | 952 | -12.52  | < 0.001  |
| poly(period,2)     | -4.402 | 0.707 | 952 | -6.23   | < 0.001  |
| tmax               | 0.047  | 0.005 | 952 | 9.53    | < 0.001  |
| <b>b.) Model 2</b> |        |       |     |         |          |
| Intercept          | 2.211  | 0.123 | 952 | 18.04   | < 0.001  |
| elevation          | 0.036  | 0.013 | 81  | 2.72    | 0.008    |
| %forest            | -0.487 | 0.122 | 81  | -4      | < 0.001  |
| poly(period,1)     | -4.129 | 0.329 | 952 | -12.54  | < 0.001  |
| poly(period,2)     | -4.288 | 0.707 | 952 | -6.07   | < 0.001  |
| tmax               | 0.048  | 0.005 | 952 | 9.69    | < 0.001  |

311

312

### 313 *Climate*

314 Flying insect biomass increased with 2019 tmax (Table 1a, Fig. S5a), and declined with  
 315 increasing elevation (Table 1b, Fig. S5b). There was a significant interaction between tmax and  
 316  $\Delta$ temp in the mid-season sampling months of June and July. In these two months tmax had a  
 317 positive effect on flying insect biomass at locations with low  $\Delta$ temps, shifting to a negative effect  
 318 of tmax on flying insect biomass at locations with high  $\Delta$ temps (Fig. 3; Table S3). Significant  
 319 interactions between tmax and  $\Delta$ temps were not found in other sampling months (Fig. 3; Table

320 S3). The slope of the effect of temperature on flying insect biomass was steeper with lower  $\Delta$   
321 temperatures in April, August, and September, though not significantly. This pattern flipped in  
322 May and October where the slope of the effect of temperature on flying insect was steeper with  
323 higher  $\Delta$  temperatures, likely due to colder temperatures in these months, though again the  
324 interaction was not significant (Fig. 3; Table S3).



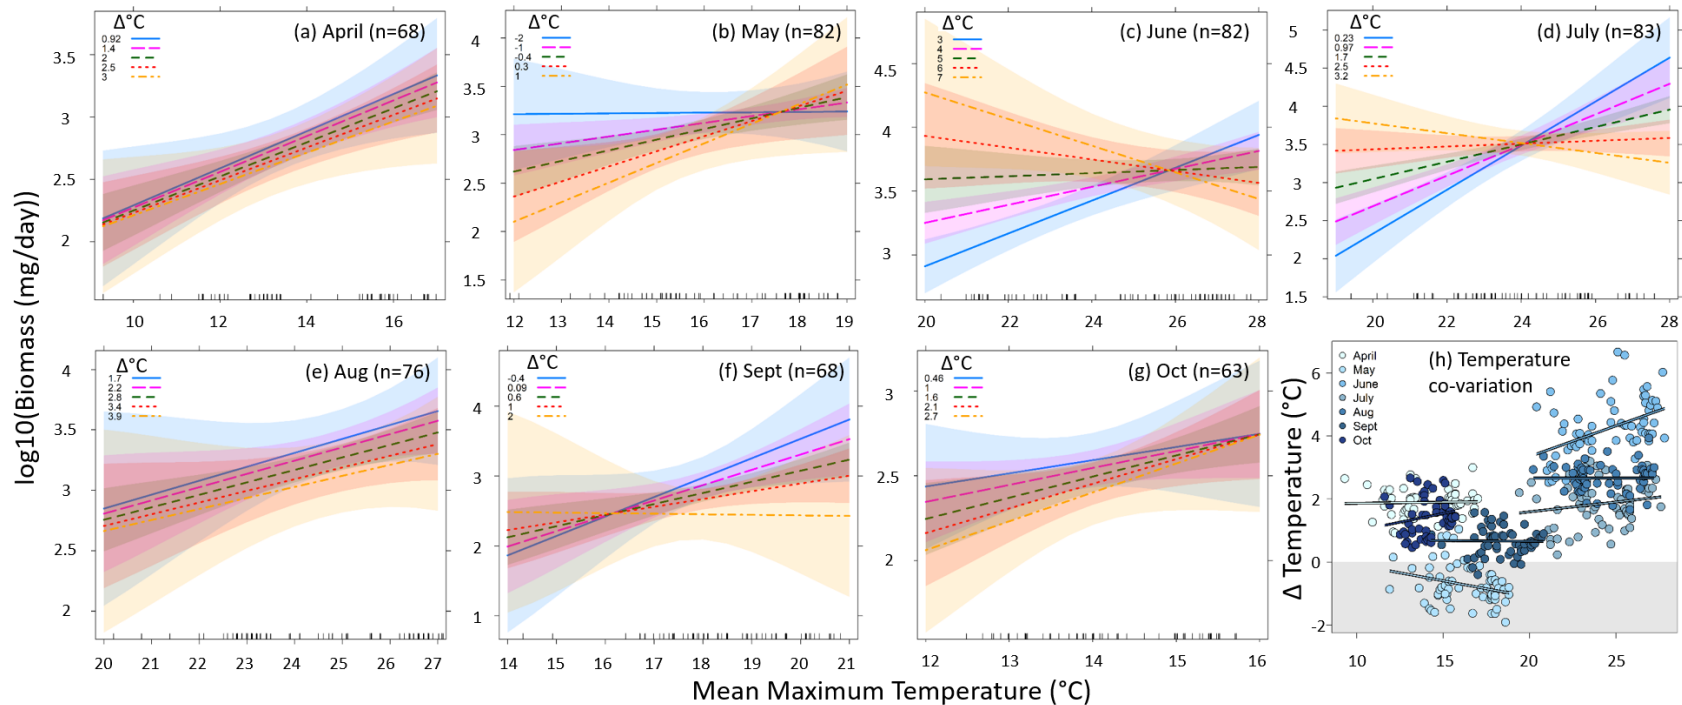

325

326 **Figure 3.** The effect of temperature on flying insect biomass was positive at the beginning of the growing season in (a) April, and (b)  
 327 May regardless of Δtemp (2019 tmax minus the long-term average tmax), shifted from positive to negative with increasing Δtemp in  
 328 (c) June and (d) July, and again became more positive with temperature independent of Δtemp in (e) August, (f) September, and (g)  
 329 October. Number of locations with sampling (n) within each month are provided within panels a-g. While hotter months tended to  
 330 have higher Δtemps, there was no consistent relationship between tmax and Δtemps within months (h). Significant interactions  
 331 between tmax and Δtemp occurred in June and July; all model coefficients are provided in Table S3

332 ***Land-cover***

333 Flying insect biomass declined with % forest in the 1 km buffer surrounding each trap location  
334 (Table 1). No other land cover categories appeared as drivers of insect biomass. Categorizing  
335 locations by dominant land-cover suggested grassland/shrublands had the highest biomass in the  
336 mid growing season (June/July; Fig. 4c), while non-irrigated cropland supported above-average  
337 biomass at either end of the growing season (May and September; Fig. 4e). Higher biomass in  
338 urban-dominated locations (April and July-September; Fig. 4f) may be due to urban-dominated  
339 locations being in southern Germany (Fig. 1) which tended to be slightly warmer (Fig. S2).

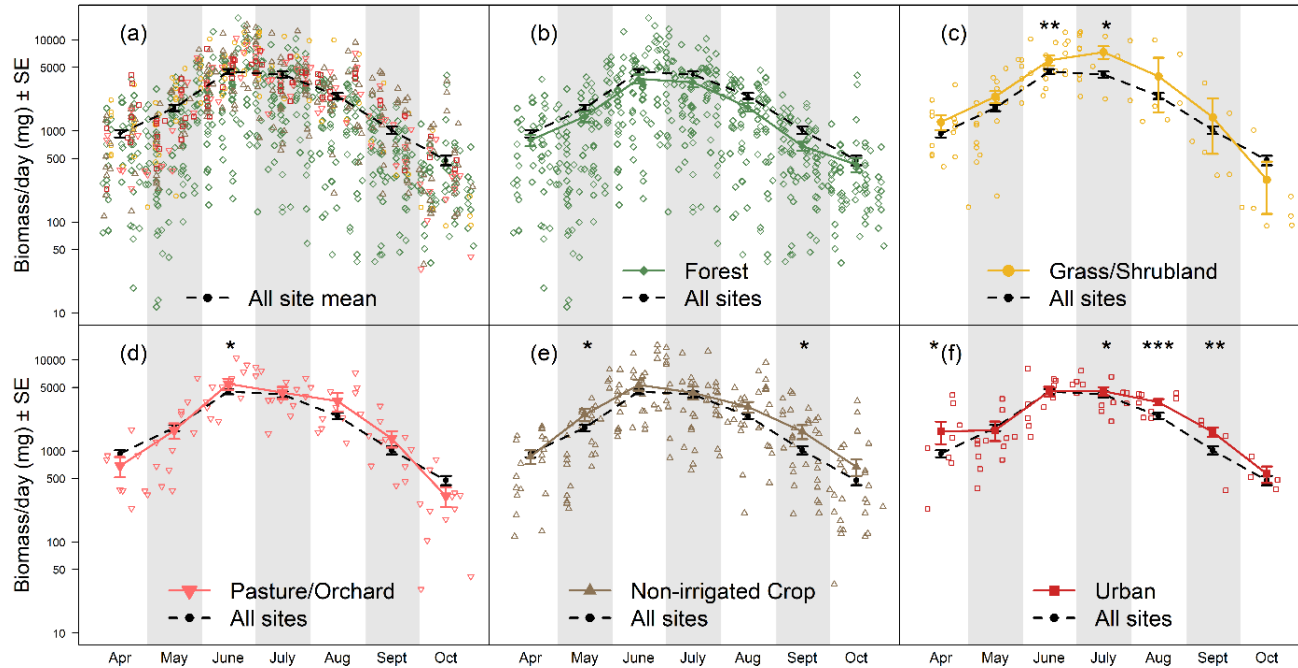

341

342 **Figure 4.** Biomass over the median sampling day across all 84 trap locations (a), and comparisons between all locations and locations  
 343 with surroundings dominated by forests (b; n=44), grassland/shrubland (c; n=9), pasture/orchard (d; n=6), non-irrigated cropland (e;  
 344 n=16), and urban environments (f; n=6). Point shapes and colors in panel (d) match the dominant land category following shapes and  
 345 colors in panels b-f. Mean and standard error are provided for biomass within each land cover category and month. Stars indicate  
 346 significant differences within each month between dominant land cover categories and all-location averages (\* =  $0.05 > P > 0.01$ , \*\* =  
 347  $0.01 > P > 0.001$ , \*\*\* =  $P < 0.001$ ).

### ***Peak biomass***

The day of the year of peak biomass varied from 148.5 (May 28-29<sup>th</sup>) to 219 (Aug. 7<sup>th</sup>) across the 73 trap locations from which it was estimable (averaging 175.1 [June 24<sup>th</sup>]  $\pm$  1.6 days SE). Model selection resulted in 12 top models with  $\Delta AIC_c < 2$  (Table S4). The most consistent result was earlier peak biomass dates in locations with more surrounding grassland/shrubland. Other drivers of peak biomass date included earlier peak biomass date with increasing elevation,  $\Delta$ temp, and % forest, and later peak biomass date with increasing precipitation, % pasture/orchard, and % urban surroundings. However, predictive power of top models of peak insect biomass date was low ( $R^2$  s ranging from 0.07-0.14; Table S4).

## **DISCUSSION**

In a study of 84 locations widely distributed across Germany, we found strong effects of temperature on flying insect biomass. Biomass increased linearly with temperature in contrast to the unimodal relationship predicted by the first prediction of our first hypothesis (**H1a**); however, when high, positive deviations from long-term average temperatures were combined with the hotter summer months of June and July, temperature no longer had a positive effect on flying insect biomass, in support of our second hypothesis (**H1b**). Temperatures in June 2019 were especially hotter than long-term averages across trap locations (averaging  $4.3^\circ\text{C} \pm 0.1$  SE). In contrast, insect biomass only increased with temperature in May 2019, which was cold relative to the long-term averages (averaging  $-0.7^\circ\text{C} \pm 0.1$  SE). The negative effect of high deviations from long-term temperature averages suggests insects are adapted to local temperature

conditions. Rapid rises in temperature may exceed locally established tolerance limits, having negative effects on insect communities even in colder climate regions.

A decelerating benefit of temperature in locations with greater increases in temperature is consistent with previous long-term studies of insects. In a study of two surveys of ant communities across North America conducted 20 years apart, and finding that sites with the largest increases in temperature had the largest declines in colony density (Kaspari et al., 2019). Hallmann et al. (2017) found a positive effect of temperature on insect biomass; however, biomass loss over time was greatest in mid-summer, when temperatures are highest. Flying insects may be more affected by rising temperatures than non-flying insects as they cannot buffer high temperatures by burrowing in soil or plant tissue (Baudier et al., 2015; Wagner, 2020). We predict future monitoring will detect increasingly negative effects of temperature due to ongoing climate warming, as temperature begins to exceed species' optimum temperature ranges.

Climate change predictions for Germany suggest slight increases in cumulative annual precipitation, but shifts in the timing of rainfall and drier summers (Bender et al., 2017). The 2019 growing season matched this prediction with June, July and August being much drier than the long-term average and with the wettest month of the study period being October. As insects can detect changes in barometric pressure and will stop flying if they sense storms approaching (Pellegrino et al., 2013), we predicted increased rainfall would result in reduced flight activity, reducing insect biomass. However, precipitation was not a significant predictor of flying insect biomass as predicted by **H2** potentially due to low variation in precipitation across locations.

With ~75% of global land significantly altered by human activities (IPBES, 2019), land-cover change and land use intensification is a major contributor to insect decline (Díaz et al., 2019; Potts et al., 2010; Winfree et al., 2011). In contrast to **H3**, we did not detect negative

effects of urban and agricultural land-cover on flying insect biomass. The strongest effect of surrounding land-cover was reduced insect biomass in forests. Forests may provide fewer floral resources than open fields (Jachula et al., 2017). Alternatively, forest vegetation structure may limit insect movement through the landscape, reducing trap catch in comparison to open systems like grasslands (Cranmer et al., 2012). The absence of an effect of heavily human-impacted habitats on flying insect biomass may be due to a minority of our locations surrounded by high proportions of these land-cover types, especially intensive agriculture. Higher temperatures in urban areas may explain the above average biomass in spring and late summer/autumn, while also making insects in urban areas more vulnerable to future warming in mid-summer.

Additionally, large variability exists in insect habitat quality of urban areas and agricultural land, ranging from paved expanses and areas with intensive pesticide use to urban gardens and low intensity organic farms (Bengtsson et al., 2005; Hausmann et al., 2020). While moderately impacted by human activity, non-irrigated agricultural areas, pasture land, and orchards in this study tended to support higher biomass, suggesting these land use types may provide suitable habitats for Germany's flying insects. Alternatively, fertilization and the prevalence of monoculture on conventional farms may increase insect biomass through alleviating nutrient limitation and providing high concentrations of host plants, while not benefiting insect biodiversity (Haddad et al., 2000; Root, 1973).

While the date of peak biomass ranged from late May to early August across trap locations and varied with land-cover types, the percent variance explained by environmental drivers was low. The average temperature at trap locations was not a predictor of the date of peak biomass, suggesting the overall positive response of flying insect biomass was not driven by shifts in biomass phenology. However, top models included a weak effect of locations with

higher  $\Delta$  temperatures having earlier peak biomass dates. Land-cover types and temperature may also interact in their effects on flying insect biomass, though our number of trap locations is prohibitory of examining many interaction terms. Earlier peak biomass dates in grasslands and forests compared to urban areas and pasture/orchard is indicative of differences between more natural and more human-modified areas and supported by previous work finding later phenologies of butterflies (Diamond et al., 2014) and flower bloom times (Li et al., 2021) in urban areas.

### ***Comparison with Hallmann et al. 2017***

A recent study (Hallmann et al., 2017) reported large declines in flying insect biomass from 63 German locations over 27 years. However, sampling locations greatly varied with years and the majority (58 out of 63) were clustered in central-west Germany; the sites do not have representative coverage of Germany or comprise an extensive latitudinal gradient (coverage of 2° latitude). Average insect biomass reported in Hallmann et al. (2017) varied from 9,192 mg/day in 1989 to 2,531 mg/day in 2016 (May-Sept average; no April 1989 sampling was conducted). In comparison, our traps collected a monthly average of 2,404 mg/day in May-Sept. However, Hallmann et al. (2017) used traps which were ~51% larger (1.79 m<sup>2</sup> per side) than those in this study (1.16 m<sup>2</sup>), suggesting higher trap catch in this study relative to the last sampling year (2016) in Hallmann et al. (2017), if trap size has an appreciable positive effect on catch. This discrepancy is most likely due to differences in sampling locations as our study cover a wider range of locations and habitats than examined in Hallmann et al. (2017), but we cannot rule out an increase in biomass of flying insects in Germany.

### ***Caveats***

Insect biomass is a common currency ecosystem-level measure of insect productivity and is an index of energy availability for higher trophic levels. Nonetheless, from biomass alone we cannot differentiate variation in abundance, body size, species diversity, or dominance. High temperatures may reduce insect body sizes within species (Atkinson, 1994; Klockmann et al., 2017; Polidori et al., 2020) or favor smaller species (Bergmann, 1848; Daufresne et al., 2009; Merckx et al., 2018). While one long-term study of flying insects in the Netherlands found no evidence of higher rates of decline in larger species over the past two decades (Hallmann et al., 2020), larger-bodied species may have become rare earlier in the last century (Seibold et al., 2015). Climate and land-cover change may otherwise alter insect communities by favoring particular trophic levels (Welti, Kuczynski, et al., 2020), invasive (Ju et al., 2017), or pest species (Bernal & Medina, 2018). The lack of an overall unimodal relationship temperature may be a result of the coarse taxonomic (flying insects) and temporal (~2 week) sample resolution in comparison to other studies (e.g. Kühnel & Blüthgen, 2015). Additionally, malaise traps do not collect all flying insects with larger insects like butterflies often being underrepresented. Finally, this monitoring program does not yet include multi-year coverage of flying insect trends. However, such space for time, or ecological gradients approaches have a long and fruitful history in ecology and are a useful method for providing predictions of temporal trends in the absence of time series (Peters et al., 2019; Pianka, 1966).

***Future directions: Importance of large-scale insect monitoring programs***



In this first study of flying insect biomass from the German Malaise Trap Program, we find that even in a temperate climate, the positive effect of temperature on flying insect biomass diminished when combined with high positive deviations in temperature from the long-term average, and hotter mid-summer months. These interactions could not have been elucidated without growing season-long monitoring across a large number of locations and a thermal gradient. Large-scale, long-term standardized monitoring is a critical tool to disentangle potential drivers of insect decline and understand how this varies with region and taxa. Empirical studies of insect communities often lack the spatial coverage to be broadly representative across habitats (but see Jeliaskov et al., 2016; Wepprich et al., 2019). Meta-analyses have large spatial coverage, but must reckon with variable research goals and methodologies (Gurevitch & Mengersen, 2010). Spatially distributed monitoring efforts of ecological communities primarily target plants and vertebrates but not insects (Eggleton, 2020). Notable exceptions include mosquito and ground beetle monitoring by the US National Ecological Observation Network (Thorpe et al., 2016), and several regional-scale Lepidoptera monitoring programs (e.g. Dennis et al., 2019; Kühn et al., 2008; van Swaay et al., 2019). The Global Malaise Trap Program, operating since 2012 (<http://biodiversitygenomics.net/projects/gmp/>), and the Swedish Malaise Trap Program (operational from 2003-2006; Karlsson et al., 2020) are taxonomic treasure troves, though neither measure biomass. The German Malaise Trap Program helps to fill the gap of a distributed, standardized, and continuous monitoring program of flying insects for Germany. Malaise traps are currently being considered as a standard component of European insect biodiversity surveys, and this program provides a blueprint for a coordinated large-scale malaise trap sampling network (Haase et al., 2018). As highlighted by the recent insect decline debate

(Wagner et al., 2021), comprehensive and standardized monitoring is critical to meet the challenge of unravelling insect trends and drivers in the Anthropocene.

## Acknowledgements

We thank Beatrice Kulawig, Monika Baumeister, Michael Ehrhardt, Sebastian Flinkerbusch, Michael Hinz, Reinhard Hölzel, Enno Klipp, Sebastian Keller, Linus Krämer, Gudrun Krimmer, Paula Kirschner, Beate Krischke, Johannes Lindner, Susanne Schiele, Verena Schmidt, Dragan Petrovic, Simon Potthast, Almuth Puschmann, Lena Unterbauer, Jan Weber, Roland Wollgarten, and the Auwaldstation Leipzig for assistance in the field and lab. We are grateful to the eLTER PLUS project (Grand Agreement No. 871128) for financial support to EARW and PH. This work was further supported by DFG AY12/6-4 to MA, DFG WE3081/21-4 to WWW, DFG MO2142/1-1 to MTM, and the Bavarian State Ministry of Science and the Arts.

## REFERENCES

- Abatzoglou, J. T., Dobrowski, S. Z., Parks, S. A., & Hegewisch, K. C. (2018). TerraClimate, a high-resolution global dataset of monthly climate and climatic water balance from 1958–2015. *Scientific Data*, 5(1), 170191. <https://doi.org/10.1038/sdata.2017.191>
- Atkinson, D. (1994). Temperature and organism size—A biological law for ectotherms? In M. Begon & A. H. Fitter (Eds.), *Advances in Ecological Research* (Vol. 25, pp. 1–58). Academic Press. [https://doi.org/10.1016/S0065-2504\(08\)60212-3](https://doi.org/10.1016/S0065-2504(08)60212-3)
- Baker, N. J., Jourdan, J., Pilotto, F., & Haase, P. (2021). Drivers of long-term changes in aquatic macroinvertebrate communities within a near pristine mountainous stream. *Science of The Total Environment*, 785, 14685.

- Barnes, A. D., Weigelt, P., Jochum, M., Ott, D., Hodapp, D., Haneda, N. F., & Brose, U. (2016). Species richness and biomass explain spatial turnover in ecosystem functioning across tropical and temperate ecosystems. *Philosophical Transactions of the Royal Society B: Biological Sciences*, 371(1694), 20150279. <https://doi.org/10.1098/rstb.2015.0279>
- Bartoń, K. (2016). *MuMIn: Multi-Model Inference* (1.43.6) [Computer software]. <https://CRAN.R-project.org/package=MuMIn>
- Bates, D., Mächler, M., Bolker, B., & Walker, S. (2015). Fitting linear mixed-effects models using lme4. *Journal of Statistical Software*, 67(1), 1–48. <https://doi.org/10.18637/jss.v067.i01>
- Baudier, K. M., Mudd, A. E., Erickson, S. C., & O’Donnell, S. (2015). Microhabitat and body size effects on heat tolerance: Implications for responses to climate change (army ants: Formicidae, Ecitoninae). *The Journal of Animal Ecology*, 84(5), 1322–1330. <https://doi.org/10.1111/1365-2656.12388>
- Bender, S., Butts, M., Hagemann, S., Smith, M., Vereecken, H., & Wendland, F. (2017). *Einfluss des Klimawandels auf die terrestrischen Wassersysteme in Deutschland. Eine Analyse ausgesuchter Studien der Jahre 2009 bis 2013* (No. 29). Climate Service Center.
- Bengtsson, J., Ahnström, J., & Weibull, A.-C. (2005). The effects of organic agriculture on biodiversity and abundance: A meta-analysis. *Journal of Applied Ecology*, 42(2), 261–269. <https://doi.org/10.1111/j.1365-2664.2005.01005.x>
- Bergmann, C. (1848). *Über die Verhältnisse der Wärmeökonomie der Thiere zu ihrer Größe*. [http://archive.org/details/bub\\_gb\\_EHo-AAAACAAJ](http://archive.org/details/bub_gb_EHo-AAAACAAJ)
- Bernal, J. S., & Medina, R. F. (2018). Agriculture sows pests: How crop domestication, host shifts, and agricultural intensification can create insect pests from herbivores. *Current Opinion in Insect Science*, 26, 76–81. <https://doi.org/10.1016/j.cois.2018.01.008>
- Burnham, K. P., & Anderson, D. R. (2003). *Model selection and multimodel inference: A practical information-theoretic approach* (2nd ed.). Springer-Verlag. <https://www.springer.com/gp/book/9780387953649>

- Büttner, G. (2014). CORINE land cover and land cover change products. In I. Manakos & M. Braun (Eds.), *Land Use and Land Cover Mapping in Europe: Practices & Trends* (pp. 55–74). Springer Netherlands. [https://doi.org/10.1007/978-94-007-7969-3\\_5](https://doi.org/10.1007/978-94-007-7969-3_5)
- Carvalho, L. G., Biesmeijer, J. C., Franzén, M., Aguirre-Gutiérrez, J., Garibaldi, L. A., Helm, A., Michez, D., Pöyry, J., Reemer, M., Schweiger, O., Den, B. L. van, WallisDeVries, M. F., & Kunin, W. E. (2020). Soil eutrophication shaped the composition of pollinator assemblages during the past century. *Ecography*, *43*(2), 209–221. <https://doi.org/10.1111/ecog.04656>
- Cranmer, L., McCollin, D., & Ollerton, J. (2012). Landscape structure influences pollinator movements and directly affects plant reproductive success. *Oikos*, *121*, 562–568. <https://doi.org/10.1111/j.1600-0706.2011.19704.x>
- Dangles, O., Crespo-Pérez, V., Andino, P., Espinosa, R., Calvez, R., & Jacobsen, D. (2011). Predicting richness effects on ecosystem function in natural communities: Insights from high-elevation streams. *Ecology*, *92*(3), 733–743. <https://doi.org/10.1890/10-0329.1>
- Daufresne, M., Lengfellner, K., & Sommer, U. (2009). Global warming benefits the small in aquatic ecosystems. *Proceedings of the National Academy of Sciences*, *106*(31), 12788–12793. <https://doi.org/10.1073/pnas.0902080106>
- Dennis, E. B., Brereton, T. M., Morgan, B. J. T., Fox, R., Shortall, C. R., Prescott, T., & Foster, S. (2019). Trends and indicators for quantifying moth abundance and occupancy in Scotland. *Journal of Insect Conservation*, *23*(2), 369–380. <https://doi.org/10.1007/s10841-019-00135-z>
- Diamond, S. E., Cayton, H., Wepprich, T., Jenkins, C. N., Dunn, R. R., Haddad, N. M., & Ries, L. (2014). Unexpected phenological responses of butterflies to the interaction of urbanization and geographic temperature. *Ecology*, *95*(9), 2613–2621. <https://doi.org/10.1890/13-1848.1>
- Díaz, S., Settele, J., Brondízio, E. S., Ngo, H. T., Agard, J., Arneeth, A., Balvanera, P., Brauman, K. A., Butchart, S. H. M., Chan, K. M. A., Garibaldi, L. A., Ichii, K., Liu, J., Subramanian, S. M., Midgley, G. F., Miloslavich, P., Molnár, Z., Obura, D., Pfaff, A., ... Zayas, C. N. (2019).

- Pervasive human-driven decline of life on Earth points to the need for transformative change. *Science*, 366(6471). <https://doi.org/10.1126/science.aax3100>
- Didham, R. K., Basset, Y., Collins, C. M., Leather, S. R., Littlewood, N. A., Menz, M. H. M., Müller, J., Packer, L., Saunders, M. E., Schönrogge, K., Stewart, A. J. A., Yanoviak, S. P., & Hassall, C. (2020). Interpreting insect declines: Seven challenges and a way forward. *Insect Conservation and Diversity*, 13(2), 103–114. <https://doi.org/10.1111/icad.12408>
- Eggleton, P. (2020). The state of the world's insects. *Annual Review of Environment and Resources*, 45(1), 61–82. <https://doi.org/10.1146/annurev-environ-012420-050035>
- European Union, Copernicus Land Monitoring Service. (2018). *European Environment Agency (EEA)*.
- Fenoglio, M. S., Rossetti, M. R., & Videla, M. (2020). Negative effects of urbanization on terrestrial arthropod communities: A meta-analysis. *Global Ecology and Biogeography*, 29(8), 1412–1429. <https://doi.org/10.1111/geb.13107>
- Fick, S. E., & Hijmans, R. J. (2017). WorldClim 2: New 1-km spatial resolution climate surfaces for global land areas. *International Journal of Climatology*, 37(12), 4302–4315. <https://doi.org/10.1002/joc.5086>
- Fox, J., & Weisberg, S. (2019). *An R Companion to Applied Regression* (3rd Edition). Sage Publications, Inc.
- GeoBasis-DE / BKG. (2013). *Digital Terrain Model grid with 200 m (DGM200)*. Bundesamt für Kartographie und Geodäsie. <http://www.bkg.bund.de>
- Goulson, D., Thompson, J., & Croombs, A. (2018). Rapid rise in toxic load for bees revealed by analysis of pesticide use in Great Britain. *PeerJ*, 6, e5255. <https://doi.org/10.7717/peerj.5255>
- Gurevitch, J., & Mengersen, K. (2010). A statistical view of synthesizing patterns of species richness along productivity gradients: Devils, forests, and trees. *Ecology*, 91(9), 2553–2560. <https://doi.org/10.1890/09-1039.1>
- Haase, P., Tonkin, J. D., Stoll, S., Burkhard, B., Frenzel, M., Geijzendorffer, I. R., Häuser, C., Klotz, S., Kühn, I., McDowell, W. H., Mirtl, M., Müller, F., Musche, M., Penner, J., Zacharias, S., &

- Schmeller, D. S. (2018). The next generation of site-based long-term ecological monitoring: Linking essential biodiversity variables and ecosystem integrity. *Science of The Total Environment*, 613–614, 1376–1384. <https://doi.org/10.1016/j.scitotenv.2017.08.111>
- Habel, J. C., Samways, M. J., & Schmitt, T. (2019). Mitigating the precipitous decline of terrestrial European insects: Requirements for a new strategy. *Biodiversity and Conservation*, 28(6), 1343–1360. <https://doi.org/10.1007/s10531-019-01741-8>
- Haddad, N. M., Haarstad, J., & Tilman, D. (2000). The effects of long-term nitrogen loading on grassland insect communities. *Oecologia*, 124(1), 73–84. <https://doi.org/10.1007/s004420050026>
- Hallmann, C. A., Sorg, M., Jongejans, E., Siepel, H., Hofland, N., Schwan, H., Stenmans, W., Mueller, A., Sumser, H., Hoerren, T., Goulson, D., & de Kroon, H. (2017). More than 75 percent decline over 27 years in total flying insect biomass in protected areas. *Plos One*, 12(10), e0185809. <https://doi.org/10.1371/journal.pone.0185809>
- Hallmann, C. A., Zeegers, T., Klink, R. van, Vermeulen, R., Wielink, P. van, Spijkers, H., Deijk, J. van, Steenis, W. van, & Jongejans, E. (2020). Declining abundance of beetles, moths and caddisflies in the Netherlands. *Insect Conservation and Diversity*, 13(2), 127–139. <https://doi.org/10.1111/icad.12377>
- Harris, I., Jones, P. D., Osborn, T. J., & Lister, D. H. (2014). Updated high-resolution grids of monthly climatic observations—The CRU TS3.10 Dataset. *International Journal of Climatology*, 34(3), 623–642. <https://doi.org/10.1002/joc.3711>
- Hausmann, A., Segerer, A. H., Greifenstein, T., Knubben, J., Morinière, J., Bozicevic, V., Doczkal, D., Günter, A., Ulrich, W., & Habel, J. C. (2020). Toward a standardized quantitative and qualitative insect monitoring scheme. *Ecology and Evolution*, 10(9), 4009–4020. <https://doi.org/10.1002/ece3.6166>
- IPBES. (2019). *Summary for policymakers of the global assessment report on biodiversity and ecosystem services*. S. Díaz, J. Settele, E. S. Brondízio E.S., H. T. Ngo, M. Guèze, J. Agard, A. Arneth, P. Balvanera, K. A. Brauman, S. H. M. Butchart, K. M. A. Chan, L. A. Garibaldi, K. Ichii, J. Liu, S.

- M. Subramanian, G. F. Midgley, P. Miloslavich, Z. Molnár, D. Obura, A. Pfaff, S. Polasky, A. Purvis, J. Razzaque, B. Reyers, R. Roy Chowdhury, Y. J. Shin, I. J. Visseren-Hamakers, K. J. Willis, and C. N. Zayas (eds.)* (summary for policy makers, p. 11). IPBES secretariat.  
<https://doi.org/10.5281/ZENODO.3553579>
- Jachuła, J., Denisow, B., & Wrzesień, M. (2017). Validation of floral food resources for pollinators in agricultural landscape in SE Poland: Validation of floral food resources for pollinators. *Journal of the Science of Food and Agriculture*, 98. <https://doi.org/10.1002/jsfa.8761>
- Janzen, D. H., & Hallwachs, W. (2019). Perspective: Where might be many tropical insects? *Biological Conservation*, 233, 102–108. <https://doi.org/10.1016/j.biocon.2019.02.030>
- Jeliazkov, A., Bas, Y., Kerbirou, C., Julien, J.-F., Penone, C., & Le Viol, I. (2016). Large-scale semi-automated acoustic monitoring allows to detect temporal decline of bush-crickets. *Global Ecology and Conservation*, 6, 208–218. <https://doi.org/10.1016/j.gecco.2016.02.008>
- Ju, R.-T., Gao, L., Wei, S.-J., & Li, B. (2017). Spring warming increases the abundance of an invasive specialist insect: Links to phenology and life history. *Scientific Reports*, 7(1), 14805.  
<https://doi.org/10.1038/s41598-017-14989-3>
- Karlsson, D., Forshage, M., Holston, K., & Ronquist, F. (2020). The data of the Swedish Malaise Trap Project, a countrywide inventory of Sweden's insect fauna. *Biodiversity Data Journal*, 8, e56286.  
<https://doi.org/10.3897/BDJ.8.e56286>
- Kaspari, M., Bujan, J., Roeder, K. A., Beurs, K. de, & Weiser, M. D. (2019). Species energy and Thermal Performance Theory predict 20-yr changes in ant community abundance and richness. *Ecology*, 100(12), e02888. <https://doi.org/10.1002/ecy.2888>
- Kingsolver, J., & Huey, R. (2008). Size, temperature, and fitness: Three rules. *Evolutionary Ecology Research*, 10, 251–268.
- Klockmann, M., Kleinschmidt, F., & Fischer, K. (2017). Carried over: Heat stress in the egg stage reduces subsequent performance in a butterfly. *PLOS ONE*, 12(7), e0180968.  
<https://doi.org/10.1371/journal.pone.0180968>

- Kühn, E., Feldmann, R., Harpke, A., Hirneisen, N., Musche, M., Leopold, P., & Settelea, J. (2008). Getting the public involved in butterfly conservation: Lessons learned from a new monitoring scheme in Germany. *Israel Journal of Ecology and Evolution*, *54*(1), 89–103.  
<https://doi.org/10.1560/IJEE.54.1.89>
- Kühnel, S., & Blüthgen, N. (2015). High diversity stabilizes the thermal resilience of pollinator communities in intensively managed grasslands. *Nature Communications*, *6*(1), 7989.  
<https://doi.org/10.1038/ncomms8989>
- Lawson, D. A., & Rands, S. A. (2019). The effects of rainfall on plant–pollinator interactions. *Arthropod-Plant Interactions*, *13*(4), 561–569. <https://doi.org/10.1007/s11829-019-09686-z>
- Li, D., Barve, N., Brenskelle, L., Earl, K., Barve, V., Belitz, M. W., Doby, J., Hantak, M. M., Oswald, J. A., Stucky, B. J., Walters, M., & Guralnick, R. P. (2021). Climate, urbanization, and species traits interactively drive flowering duration. *Global Change Biology*, *27*(4), 892–903.  
<https://doi.org/10.1111/gcb.15461>
- Losey, J. E., & Vaughan, M. (2006). The economic value of ecological services provided by insects. *BioScience*, *56*(4), 311–323. [https://doi.org/10.1641/0006-3568\(2006\)56\[311:TEVOES\]2.0.CO;2](https://doi.org/10.1641/0006-3568(2006)56[311:TEVOES]2.0.CO;2)
- Macgregor, C. J., Williams, J., Bell, J., & Thomas, C. (2019). Moth biomass increases and decreases over 50 years in Britain. *Nature Ecology and Evolution*. <http://eprints.whiterose.ac.uk/151824/>
- Merckx, T., Souffreau, C., Kaiser, A., Baardsen, L. F., Backeljau, T., Bonte, D., Brans, K. I., Cours, M., Dahirel, M., Debortoli, N., De Wolf, K., Engelen, J. M. T., Fontaneto, D., Gianuca, A. T., Govaert, L., Hendrickx, F., Higuti, J., Lens, L., Martens, K., ... Van Dyck, H. (2018). Body-size shifts in aquatic and terrestrial urban communities. *Nature*, *558*(7708), 113–116.  
<https://doi.org/10.1038/s41586-018-0140-0>
- Montgomery, D. C., Peck, E. A., & Vining, G. G. (2021). *Introduction to linear regression analysis* (Vol. 6th). John Wiley & Sons.
- Myhre, G., Alterskjær, K., Stjern, C. W., Hodnebrog, Ø., Marelle, L., Samset, B. H., Sillmann, J., Schaller, N., Fischer, E., Schulz, M., & Stohl, A. (2019). Frequency of extreme precipitation



- increases extensively with event rareness under global warming. *Scientific Reports*, 9(1), 16063.  
<https://doi.org/10.1038/s41598-019-52277-4>
- Newbold, T., Bentley, L. F., Hill, S. L. L., Edgar, M. J., Horton, M., Su, G., Şekercioğlu, Ç. H., Collen, B., & Purvis, A. (2020). Global effects of land use on biodiversity differ among functional groups. *Functional Ecology*, 34(3), 684–693. <https://doi.org/10.1111/1365-2435.13500>
- Owens, A. C. S., Cochard, P., Durrant, J., Farnworth, B., Perkin, E. K., & Seymoure, B. (2020). Light pollution is a driver of insect declines. *Biological Conservation*, 241, 108259.  
<https://doi.org/10.1016/j.biocon.2019.108259>
- Pellegrino, A., Peñaflor, M. F., Nardi, C., Bezner-Kerr, W., Guglielmo, C., Bento, J. M., & Mcneil, J. (2013). Weather forecasting by insects: Modified sexual behaviour in response to atmospheric pressure changes. *PloS One*, 8, e75004. <https://doi.org/10.1371/journal.pone.0075004>
- Peters, M. K., Hemp, A., Appelhans, T., Becker, J. N., Behler, C., Classen, A., Detsch, F., Ensslin, A., Ferger, S. W., Frederiksen, S. B., Gebert, F., Gerschlaier, F., Gütlein, A., Helbig-Bonitz, M., Hemp, C., Kindeketa, W. J., Kühnel, A., Mayr, A. V., Mwangomo, E., ... Steffan-Dewenter, I. (2019). Climate–land-use interactions shape tropical mountain biodiversity and ecosystem functions. *Nature*, 568(7750), 88–92. <https://doi.org/10.1038/s41586-019-1048-z>
- Pianka, E. R. (1966). Latitudinal gradients in species diversity: A review of concepts. *The American Naturalist*, 100(910), 33–46.
- Piano, E., Souffreau, C., Merckx, T., Baardsen, L. F., Backeljau, T., Bonte, D., Brans, K. I., Cours, M., Dahirel, M., Debortoli, N., Decaestecker, E., De Wolf, K., Engelen, J. M. T., Fontaneto, D., Gianuca, A. T., Govaert, L., Hanashiro, F. T. T., Higuti, J., Lens, L., ... Hendrickx, F. (2020). Urbanization drives cross-taxon declines in abundance and diversity at multiple spatial scales. *Global Change Biology*, 26(3), 1196–1211. <https://doi.org/10.1111/gcb.14934>
- Polidori, C., Gutiérrez-Cánovas, C., Sánchez, E., Tormos, J., Castro, L., & Sánchez-Fernández, D. (2020). Climate change-driven body size shrinking in a social wasp. *Ecological Entomology*, 45(1), 130–141. <https://doi.org/10.1111/een.12781>

- Potts, S. G., Biesmeijer, J. C., Kremen, C., Neumann, P., Schweiger, O., & Kunin, W. E. (2010). Global pollinator declines: Trends, impacts and drivers. *Trends in Ecology & Evolution*, 25(6), 345–353. <https://doi.org/10.1016/j.tree.2010.01.007>
- QGIS.org. (2020). *QGIS Geographic Information System. Open Source Geospatial Foundation Project*.
- R Core Team. (2020). *R: A language and environment for statistical computing* (4.0.3) [Computer software]. R Foundation for Statistical Computing. <http://www.R-project.org/>
- Root, R. B. (1973). Organization of a plant-arthropod association in simple and diverse habitats: The fauna of collards (*Brassica oleracea*). *Ecological Monographs*, 43(1), 95–124. <https://doi.org/10.2307/1942161>
- Seibold, S., Brandl, R., Buse, J., Hothorn, T., Schmidl, J., Thorn, S., & Müller, J. (2015). Association of extinction risk of saproxylic beetles with ecological degradation of forests in Europe. *Conservation Biology*, 29(2), 382–390. <https://doi.org/10.1111/cobi.12427>
- Seibold, S., Gossner, M. M., Simons, N. K., Blüthgen, N., Müller, J., Ambarlı, D., Ammer, C., Bauhus, J., Fischer, M., Habel, J. C., Linsenmair, K. E., Nauss, T., Penone, C., Prati, D., Schall, P., Schulze, E.-D., Vogt, J., Wöllauer, S., & Weisser, W. W. (2019). Arthropod decline in grasslands and forests is associated with landscape-level drivers. *Nature*, 574(7780), 671–674. <https://doi.org/10.1038/s41586-019-1684-3>
- Shortall, C. R., Moore, A., Smith, E., Hall, M. J., Woiwod, I. P., & Harrington, R. (2009). Long-term changes in the abundance of flying insects. *Insect Conservation and Diversity*, 2(4), 251–260. <https://doi.org/10.1111/j.1752-4598.2009.00062.x>
- Sinclair, B. J., Marshall, K. E., Sewell, M. A., Levesque, D. L., Willett, C. S., Slotsbo, S., Dong, Y., Harley, C. D. G., Marshall, D. J., Helmuth, B. S., & Huey, R. B. (2016). Can we predict ectotherm responses to climate change using thermal performance curves and body temperatures? *Ecology Letters*, 19(11), 1372–1385. <https://doi.org/10.1111/ele.12686>
- Stepanian, P. M., Entekin, S. A., Wainwright, C. E., Mirkovic, D., Tank, J. L., & Kelly, J. F. (2020). Declines in an abundant aquatic insect, the burrowing mayfly, across major North American

- waterways. *Proceedings of the National Academy of Sciences*, 117(6), 2987–2992.  
<https://doi.org/10.1073/pnas.1913598117>
- Svenningsen, C. S., Bowler, D. E., Hecker, S., Bladt, J., Grescho, V., Dam, N. M. van, Dauber, J., Eichenberg, D., Ejrnæs, R., Fløjgaard, C., Frenzel, M., Frøslev, T. G., Hansen, A. J., Heilmann-Clausen, J., Huang, Y., Larsen, J. C., Menger, J., Nayan, N. L. B. M., Pedersen, L. B., ... Bonn, A. (2020). Contrasting impacts of urban and farmland cover on flying insect biomass. *BioRxiv*, 2020.09.16.299404. <https://doi.org/10.1101/2020.09.16.299404>
- Termaat, T., Strien, A. J. van, Grunsven, R. H. A. van, Knijf, G. D., Bjelke, U., Burbach, K., Conze, K.-J., Goffart, P., Hepper, D., Kalkman, V. J., Motte, G., Prins, M. D., Prunier, F., Sparrow, D., Top, G. G. van den, Vanappelghem, C., Winterholler, M., & WallisDeVries, M. F. (2019). Distribution trends of European dragonflies under climate change. *Diversity and Distributions*, 25(6), 936–950. <https://doi.org/10.1111/ddi.12913>
- Thorpe, A. S., Barnett, D. T., Elmendorf, S. C., Hinckley, E.-L. S., Hoekman, D., Jones, K. D., LeVan, K. E., Meier, C. L., Stanish, L. F., & Thibault, K. M. (2016). Introduction to the sampling designs of the National Ecological Observatory Network Terrestrial Observation System. *Ecosphere*, 7(12), e01627. <https://doi.org/10.1002/ecs2.1627>
- Totland, Ö. (1994). Intra-seasonal variation in pollination intensity and seed set in an alpine population of *Ranunculus acris* in southwestern Norway. *Ecography*, 17(2), 159–165.
- van Swaay, C., Dennis, E. B., Schmucki, R., Sevilleja, C., Balalaikins, M., Botham, M., Bourn, N., Brereton, T., Cancela, J. P., Carlisle, B., Chambers, P., Collins, S., Dopagne, C., Escobes, R., Feldmann, R., Fernandez-Gracia, J. M., Fontaine, B., Gracianteparaluceta, A., Harrower, C., ... Roy, D. B. (2019). *The EU butterfly indicator for grassland species: 1990-2017*.
- Vanbergen, A. J., & Insect Pollinators Initiative. (2013). Threats to an ecosystem service: Pressures on pollinators. *Frontiers in Ecology and the Environment*, 11(5), 251–259.  
<https://doi.org/10.1890/120126>

- Wagner, D. L. (2020). Insect declines in the Anthropocene. *Annual Review of Entomology*, 65(1), 457–480. <https://doi.org/10.1146/annurev-ento-011019-025151>
- Wagner, D. L., Grames, E. M., Forister, M. L., Berenbaum, M. R., & Stopak, D. (2021). Insect decline in the Anthropocene: Death by a thousand cuts. *Proceedings of the National Academy of Sciences*, 118(2). <https://doi.org/10.1073/pnas.2023989118>
- Warren, R., Price, J., Graham, E., Forstnerhaeusler, N., & VanDerWal, J. (2018). The projected effect on insects, vertebrates, and plants of limiting global warming to 1.5°C rather than 2°C. *Science*, 360(6390), 791–795. <https://doi.org/10.1126/science.aar3646>
- Welti, E. A. R., Kuczynski, L., Marske, K., Sanders, N. J., de Beurs, K. M., & Kaspari, M. (2020). Salty, mild, and low plant biomass grasslands increase top-heaviness of invertebrate trophic pyramids. *Global Ecology and Biogeography*, 29(9), 1474–1485. <https://doi.org/10.1111/GEB.13119>
- Welti, E. A. R., Roeder, K. A., de Beurs, K. M., Joern, A., & Kaspari, M. (2020). Nutrient dilution and climate cycles underlie declines in a dominant insect herbivore. *Proceedings of the National Academy of Sciences of the United States of America*, 117(13), 7271–7275. <https://doi.org/10.1073/pnas.1920012117>
- Wepprich, T., R. Adrion, J., Ries, L., Wiedmann, J., & M. Haddad, N. (2019). Butterfly abundance declines over 20 years of systematic monitoring in Ohio, USA. *PLOS ONE*, 14, e0216270. <https://doi.org/10.1371/journal.pone.0216270>
- Wilson, R. J., & Fox, R. (2020). Insect responses to global change offer signposts for biodiversity and conservation. *Ecological Entomology*, Early View. <https://doi.org/10.1111/een.12970>
- Winfree, R., Bartomeus, I., & Cariveau, D. P. (2011). Native pollinators in Anthropogenic habitats. *Annual Review of Ecology, Evolution, and Systematics*, 42(1), 1–22. <https://doi.org/10.1146/annurev-ecolsys-102710-145042>
- Zuur, A., Ieno, E. N., Walker, N., Saveliev, A. A., & Smith, G. M. (2009). *Mixed effects models and extensions in ecology with R*. Springer-Verlag. <https://doi.org/10.1007/978-0-387-87458-6>

## **Supporting Information: Supplemental Tables and Figures for:**

Temperature drives variation in flying insect biomass across a German malaise trap network

### **Contents:**

Table S1-S4

Fig. S1-S5

**Table S1. Locations of 84 malaise traps and dominant land-cover category.**

| Location                                                  | Latitude    | Longitude   | Dominant Land-cover |
|-----------------------------------------------------------|-------------|-------------|---------------------|
| Nationalpark Jasmund_Gumm / 3                             | 54.555368   | 13.577896   | NonIrrigatedCrop    |
| Nationalpark Jasmund_Fahrn / 2                            | 54.546179   | 13.659444   | Forest              |
| Nationalpark Jasmund_Goethe / 1                           | 54.534736   | 13.655306   | Forest              |
| Nationalpark Vorpommersche Boddenlandschaft_DO / 1        | 54.477017   | 12.5112     | Saltwater           |
| Nationalpark Vorpommersche Boddenlandschaft_Lang / 2      | 54.441805   | 12.49133    | Forest              |
| Nationalpark Vorpommersche Boddenlandschaft_Heidensee / 3 | 54.437983   | 12.49335    | Forest              |
| Uni Rostock_ZI                                            | 54.42497    | 12.68462    | Freshwater          |
| Uni Greifswald_ELD/02                                     | 54.07926    | 13.476209   | NonIrrigatedCrop    |
| Uni Greifswald_ELD/01                                     | 54.075671   | 13.479164   | NonIrrigatedCrop    |
| BR Flusslandschaft Elbe MV_Rb_01                          | 53.84217    | 11.12053    | NonIrrigatedCrop    |
| Nationalpark Niedersächsisches Wattenmeer                 | 53.58827096 | 6.723134972 | PastureOrchard      |
| BR Schaalsee_Kb_01                                        | 53.464759   | 10.464053   | NonIrrigatedCrop    |
| BR Schaalsee_Db_01                                        | 53.335175   | 11.050982   | NonIrrigatedCrop    |
| BR Flusslandschaft Elbe MV                                | 53.204663   | 11.030898   | Forest              |
| Nationalpark Unteres Odertal_AGG                          | 53.130186   | 14.359659   | GrassShrubland      |
| Nationalpark Unteres Odertal_AGU                          | 53.062096   | 14.323734   | GrassShrubland      |
| Leibniz-Institut für Gewässerökologie und Binnenfischerei | 52.451228   | 13.643994   | Forest              |
| Nationalpark Harz_NP_Hz_Bu                                | 51.8801     | 10.6553     | Forest              |
| Nationalpark Harz_NP_Hz_Bro                               | 51.7982     | 10.6174     | Forest              |
| Nationalpark Harz_NP_Hz_Fi                                | 51.7924     | 10.5155     | Forest              |
| TERENO_TER_FBG_1                                          | 51.622578   | 11.723798   | NonIrrigatedCrop    |
| TERENO_TER_FBG_2                                          | 51.62093    | 11.701777   | NonIrrigatedCrop    |
| TERENO_TER_SST_1                                          | 51.393613   | 11.748875   | NonIrrigatedCrop    |
| TERENO_TER_SST_2                                          | 51.39195    | 11.703426   | NonIrrigatedCrop    |
| Leipziger Auwaldkran_LCC-AWS-01                           | 51.377217   | 12.280009   | Forest              |
| Leipziger Auwaldkran_LCC-AWS-02                           | 51.375858   | 12.276423   | Forest              |
| Leipziger Auwaldkran_LCC-LE                               | 51.367403   | 12.308824   | Forest              |
| BR Oberlausitzer Heide- und Teichlandschaft_TG/3          | 51.350467   | 14.664863   | Freshwater          |
| BR Oberlausitzer Heide- und Teichlandschaft_GL/1          | 51.346559   | 14.575978   | PastureOrchard      |
| BR Oberlausitzer Heide- und Teichlandschaft_AL/2          | 51.34004    | 14.634769   | Forest              |
| Nationalpark Kellerwald-Edersee_NP_Kel_02                 | 51.159      | 8.93955     | Forest              |
| Nationalpark Kellerwald-Edersee_NP_Kel_04                 | 51.15508    | 8.79752     | Forest              |
| Nationalpark Kellerwald-Edersee_NP_Kel_01                 | 51.14229    | 8.92874     | Forest              |
| Nationalpark Kellerwald-Edersee_NP_Kel_03                 | 51.13155    | 8.97643     | Forest              |
| Biodiversitäts-Exploratorium Hainich-Dün_HEG 19           | 51.073372   | 10.473357   | PastureOrchard      |
| Biodiversitäts-Exploratorium Hainich-Dün_HEW 42           | 51.06991    | 10.273537   | Forest              |
| Kammeyergarten (HTW Dresden)                              | 51.00973    | 13.87283    | Urban               |
| Nationalpark Eifel_K7                                     | 50.60815    | 6.423185    | Forest              |
| Nationalpark Eifel_Lohrbachskopf                          | 50.596079   | 6.464039    | Forest              |
| Nationalpark Eifel_Malsbenden                             | 50.579769   | 6.467363    | Forest              |
| Nationalpark Eifel_Dedenborn                              | 50.569256   | 6.359577    | Forest              |
| Nationalpark Eifel_Klusenberg                             | 50.558923   | 6.403459    | PastureOrchard      |

|                                                            |             |             |                  |
|------------------------------------------------------------|-------------|-------------|------------------|
| Nationalpark Eifel_Müsalsberg                              | 50.540129   | 6.380197    | GrassShrubland   |
| Rhein-Main-Observatorium_O7 M5                             | 50.32513    | 9.49509     | PastureOrchard   |
| Rhein-Main-Observatorium_S5 M4                             | 50.19838    | 9.18597     | Urban            |
| Rhein-Main-Observatorium_O3 M3                             | 50.18603    | 9.09684     | NonIrrigatedCrop |
| Rhein-Main-Observatorium_W4 M2                             | 50.18383    | 9.08732     | Forest           |
| Rhein-Main-Observatorium_A1 M6                             | 50.17989    | 8.95835     | NonIrrigatedCrop |
| Rhein-Main-Observatorium_W2 M1                             | 50.14157    | 8.98389     | Forest           |
| Hammelburg_672/0879                                        | 50.10155    | 9.872025    | Forest           |
| Hammelburg_672/0623                                        | 50.081017   | 9.868256    | GrassShrubland   |
| Hammelburg_672/0660                                        | 50.080042   | 9.854267    | GrassShrubland   |
| Hammelburg_672/0613                                        | 50.061344   | 9.853936    | GrassShrubland   |
| Hammelburg_672/0632                                        | 50.053814   | 9.862878    | GrassShrubland   |
| Haßfurt-Prappach                                           | 50.052633   | 10.567867   | NonIrrigatedCrop |
| Hammelburg_672/0878                                        | 50.051675   | 9.810758    | Forest           |
| Hammelburg_672/0614                                        | 50.050261   | 9.867828    | GrassShrubland   |
| Hammelburg_672/0619                                        | 50.05       | 9.857231    | GrassShrubland   |
| Zeil-Schmachtenberg                                        | 50.004987   | 10.609725   | NonIrrigatedCrop |
| Ebelsbach-Steinbach                                        | 49.998288   | 10.63084    | NonIrrigatedCrop |
| Ebelsbach_1100/049                                         | 49.9814     | 10.686604   | Forest           |
| Ebelsbach_1100/053                                         | 49.97884    | 10.701188   | Forest           |
| Bavaria_6029_3For                                          | 49.91667    | 10.52549    | Forest           |
| Bavaria_6225_2Urb                                          | 49.77293    | 9.929597    | Urban            |
| Nationalpark Hunsrück-Hochwald_Erbeskopf / 4               | 49.72858    | 7.094094    | Forest           |
| Nationalpark Hunsrück-Hochwald_Wildwiese Thranenweiher / 3 | 49.7081     | 7.10412     | Forest           |
| Nationalpark Hunsrück-Hochwald_Bunker / 2                  | 49.702007   | 7.090252    | Forest           |
| Nationalpark Hunsrück-Hochwald_Abentheuer / 1              | 49.652115   | 7.090571    | Forest           |
| Bavaria_6532_3Urb                                          | 49.420593   | 11.050254   | Urban            |
| Bavaria_6945_2For                                          | 49.08558    | 13.304759   | Forest           |
| Nationalpark Bayerischer Wald_KOL                          | 49.05463    | 13.2552     | Forest           |
| Bavaria_6938_4Urb                                          | 49.00426    | 12.09667    | Urban            |
| Nationalpark Bayerischer Wald_BER                          | 48.89879    | 13.44339    | Forest           |
| Nationalpark Schwarzwald_NP_SW_02                          | 48.688465   | 8.241284    | Forest           |
| Nationalpark Schwarzwald_NP_SW_03                          | 48.684751   | 8.235532    | Forest           |
| Bavaria_7544_2Ag                                           | 48.583249   | 13.390587   | Urban            |
| Nationalpark Schwarzwald_NP_SW_01                          | 48.510327   | 8.219127    | Forest           |
| Biodiversitäts-Exploratorium Schwäbische Alb_AEG 50        | 48.405781   | 9.467762    | PastureOrchard   |
| Biodiversitäts-Exploratorium Schwäbische Alb_AEW 06        | 48.394119   | 9.446531    | Forest           |
| Bavaria_7935_2Urb                                          | 48.06033    | 11.64965    | NonIrrigatedCrop |
| Bavaria_8130_2For                                          | 47.87829    | 10.81209    | Forest           |
| Nationalpark Berchtesgaden_Stubenalm 2                     | 47.58952579 | 12.93652472 | Forest           |
| Nationalpark Berchtesgaden_Schapbach 1                     | 47.58526593 | 12.95199356 | Forest           |
| Nationalpark Berchtesgaden                                 | 47.57017655 | 12.95833947 | Forest           |

**Table S2. Top AIC models ( $\Delta AIC_c < 2$ ) of predictors of flying insect biomass.** All models included the random variable of trap identity. Predictor variables are defined in the Methods. Marg  $R^2$ = marginal  $R^2$  or the percent variance explained by the fixed effects, Cond  $R^2$ = conditional  $R^2$  or the percent variance explained by the fixed effects plus the random effect of trap, df= degrees of freedom, logLik= log likelihood, and w= model weight. For summary tables of model estimates, see Table 1.

| Int  | elevation | poly (period,2) | tmax    | %forest | Marg $R^2$ | Cond $R^2$ | df | logLik  | AICc  | $\Delta$ | w     |
|------|-----------|-----------------|---------|---------|------------|------------|----|---------|-------|----------|-------|
| 2.28 |           | +               | 0.04708 | -0.319  | 0.43       | 0.73       | 7  | -378.56 | 771.2 | 0        | 0.17  |
| 2.21 | 0.036     | +               | 0.04787 | -0.487  | 0.45       | 0.73       | 8  | -378.39 | 772.9 | 1.7      | 0.073 |



1 **Table S3. Model coefficients for the interaction between monthly tmax and Δtemp (Fig. 3).**  
 2 Models were fit for each 2019 sampling month including April (a;  $F_{(3,64)} = 13.2$ ,  $R^2 = 0.38$ ,  $P <$   
 3  $0.001$ ), May (b;  $F_{(3,78)} = 6.8$ ,  $R^2 = 0.21$ ,  $P < 0.001$ ), June (c;  $F_{(3,78)} = 14.5$ ,  $R^2 = 0.36$ ,  $P < 0.001$ ),  
 4 July (d;  $F_{(3,79)} = 15.5$ ,  $R^2 = 0.37$ ,  $P < 0.001$ ), August (e;  $F_{(3,72)} = 5.3$ ,  $R^2 = 0.18$ ,  $P = 0.002$ ),  
 5 September (f;  $F_{(3,64)} = 5.7$ ,  $R^2 = 0.21$ ,  $P = 0.002$ ), and October (g;  $F_{(3,59)} = 3.1$ ,  $R^2 = 0.14$ ,  $P =$   
 6  $0.03$ ).

|                     | Estimate | Stand. Error | t-value | P       |
|---------------------|----------|--------------|---------|---------|
| <b>a) April</b>     |          |              |         |         |
| Intercept           | 0.74     | 1.42         | 0.52    | 0.61    |
| tmax                | 0.16     | 0.10         | 1.53    | 0.13    |
| Δtemp               | 0.07     | 0.70         | 0.11    | 0.92    |
| tmax * Δtemp        | -0.01    | 0.05         | -0.22   | 0.83    |
| <b>b) May</b>       |          |              |         |         |
| Intercept           | 0.83     | 0.76         | 1.10    | 0.28    |
| tmax                | 0.14     | 0.05         | 2.81    | 0.006   |
| Δtemp               | -1.17    | 0.80         | -1.46   | 0.15    |
| tmax * Δtemp        | 0.07     | 0.05         | 1.31    | 0.19    |
| <b>c) June</b>      |          |              |         |         |
| Intercept           | -4.19    | 1.81         | -2.31   | 0.023   |
| tmax                | 0.30     | 0.08         | 4.03    | < 0.001 |
| Δtemp               | 1.51     | 0.43         | 3.47    | < 0.001 |
| tmax * Δtemp        | -0.06    | 0.02         | -3.28   | < 0.001 |
| <b>d) July</b>      |          |              |         |         |
| Intercept           | -4.11    | 1.38         | -2.99   | 0.004   |
| tmax                | 0.32     | 0.06         | 5.36    | < 0.001 |
| Δtemp               | 2.87     | 0.71         | 4.05    | < 0.001 |
| tmax * Δtemp        | -0.12    | 0.03         | -3.94   | < 0.001 |
| <b>e) August</b>    |          |              |         |         |
| Intercept           | 0.32     | 4.92         | 0.06    | 0.95    |
| tmax                | 0.13     | 0.20         | 0.67    | 0.50    |
| Δtemp               | 0.13     | 1.75         | 0.08    | 0.94    |
| tmax * Δtemp        | -0.01    | 0.07         | -0.16   | 0.88    |
| <b>f) September</b> |          |              |         |         |
| Intercept           | -1.25    | 1.61         | -0.78   | 0.44    |
| tmax                | 0.23     | 0.09         | 2.58    | 0.012   |
| Δtemp               | 1.93     | 2.25         | 0.85    | 0.40    |
| tmax * Δtemp        | -0.12    | 0.13         | -0.95   | 0.35    |
| <b>g) October</b>   |          |              |         |         |
| Intercept           | 1.81     | 1.75         | 1.03    | 0.31    |
| tmax                | 0.06     | 0.13         | 0.46    | 0.64    |
| Δtemp               | -0.66    | 1.13         | -0.59   | 0.56    |
| tmax * Δtemp        | 0.04     | 0.08         | 0.51    | 0.61    |

7 **Table S4. Top models ( $\Delta AIC_c < 2$ ) for day of peak flying insect biomass.** Predictor variables  
 8 are defined in the Methods. Df= degrees of freedom, logLik= log likelihood, and w= model  
 9 weight.

| Intercept | elevation | precip | $\Delta$ temp | %forest | %grassland<br>/shrubland | %pasture<br>/orchard | %urban | R <sup>2</sup> | df | logLik  | AICc  | $\Delta AIC_c$ | w     |
|-----------|-----------|--------|---------------|---------|--------------------------|----------------------|--------|----------------|----|---------|-------|----------------|-------|
| 183.1     |           |        |               |         | -20.85                   |                      |        | 0.07           | 3  | -291.94 | 590.2 | 0              | 0.03  |
| 180.9     |           |        |               |         | -19.1                    | 14.66                |        | 0.09           | 4  | -290.87 | 590.3 | 0.12           | 0.028 |
| 174.4     | -1.93     | 2.41   |               |         | -21.83                   |                      |        | 0.11           | 5  | -289.96 | 590.8 | 0.59           | 0.022 |
| 171.6     | -1.83     | 2.46   |               |         | -20.37                   | 14.35                |        | 0.13           | 6  | -288.92 | 591.1 | 0.9            | 0.019 |
| 193.5     |           |        | -5.01         |         | -21.66                   |                      |        | 0.08           | 4  | -291.31 | 591.2 | 0.98           | 0.018 |
| 185.1     |           |        |               | -4.13   | -22.29                   |                      |        | 0.08           | 4  | -291.51 | 591.6 | 1.39           | 0.015 |
| 190.2     |           |        | -4.40         |         | -19.94                   | 13.65                |        | 0.1            | 5  | -290.38 | 591.7 | 1.44           | 0.015 |
| 184.7     | -1.84     | 2.61   | -5.72         |         | -23.25                   |                      |        | 0.13           | 6  | -289.22 | 591.7 | 1.49           | 0.014 |
| 184.2     | -0.32     |        |               |         | -20.29                   |                      |        | 0.07           | 4  | -291.72 | 592   | 1.8            | 0.012 |
| 175       | -1.75     | 2.64   |               | -5.49   | -24.47                   |                      |        | 0.12           | 6  | -289.44 | 592.1 | 1.92           | 0.011 |
| 181.6     | -1.75     | 2.64   | -5.48         |         | -21.78                   | 13.92                |        | 0.14           | 7  | -288.22 | 592.2 | 1.95           | 0.011 |
| 182.6     |           |        |               |         | -19.9                    |                      | 5.41   | 0.07           | 4  | -291.80 | 592.2 | 1.97           | 0.011 |

10

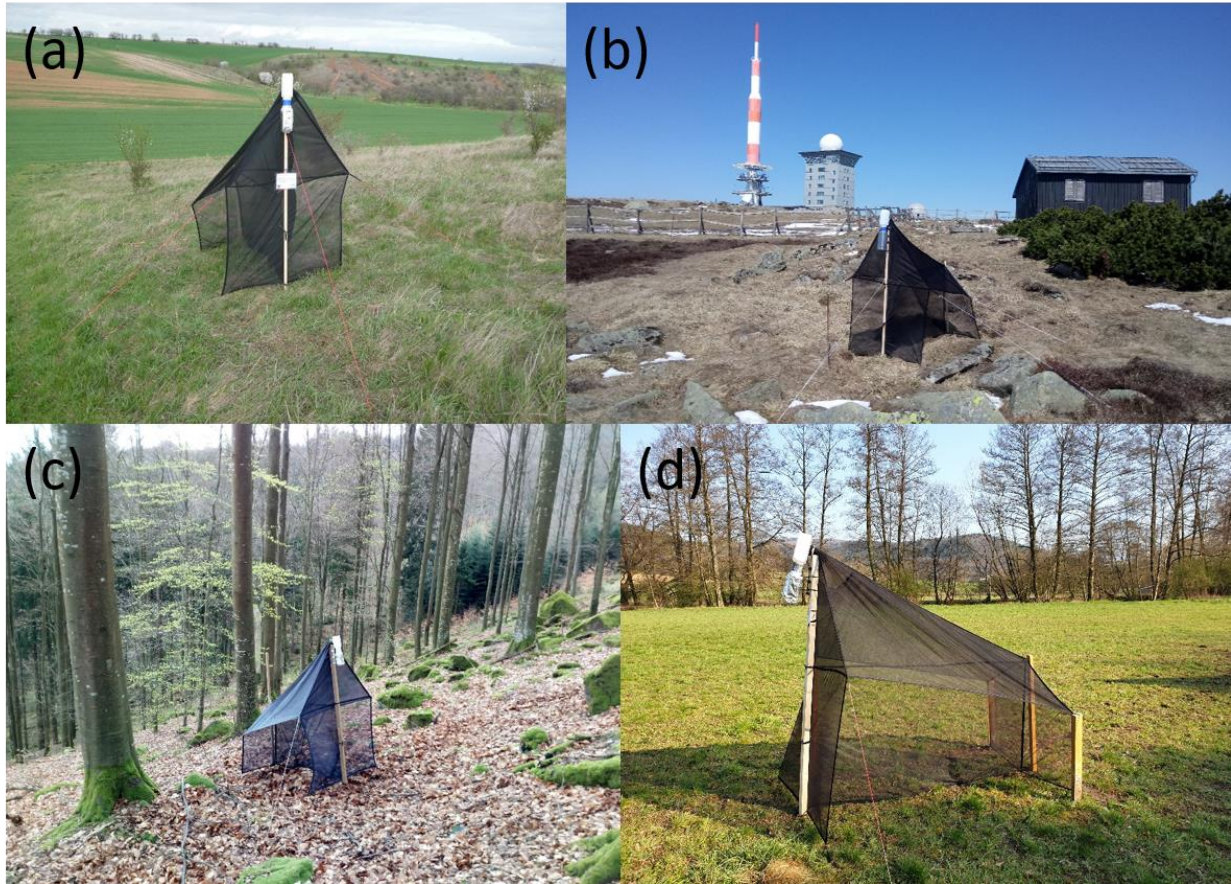

11

12 **Figure S1.** Examples of traps running in 2019 as part of the German Malaise Trap Program.  
13 Photos show traps at the LTER site Tereno- Friedeburg (a; photo credit: Mark Frenzel), at the  
14 Harz National Park (b; photo credit: Andreas Marten), at the Black Forest National Park (c;  
15 photo credit: Jörn Buse), and at the LTER site Rhine-Main-Observatory (d; photo credit: Peter  
16 Haase).

17

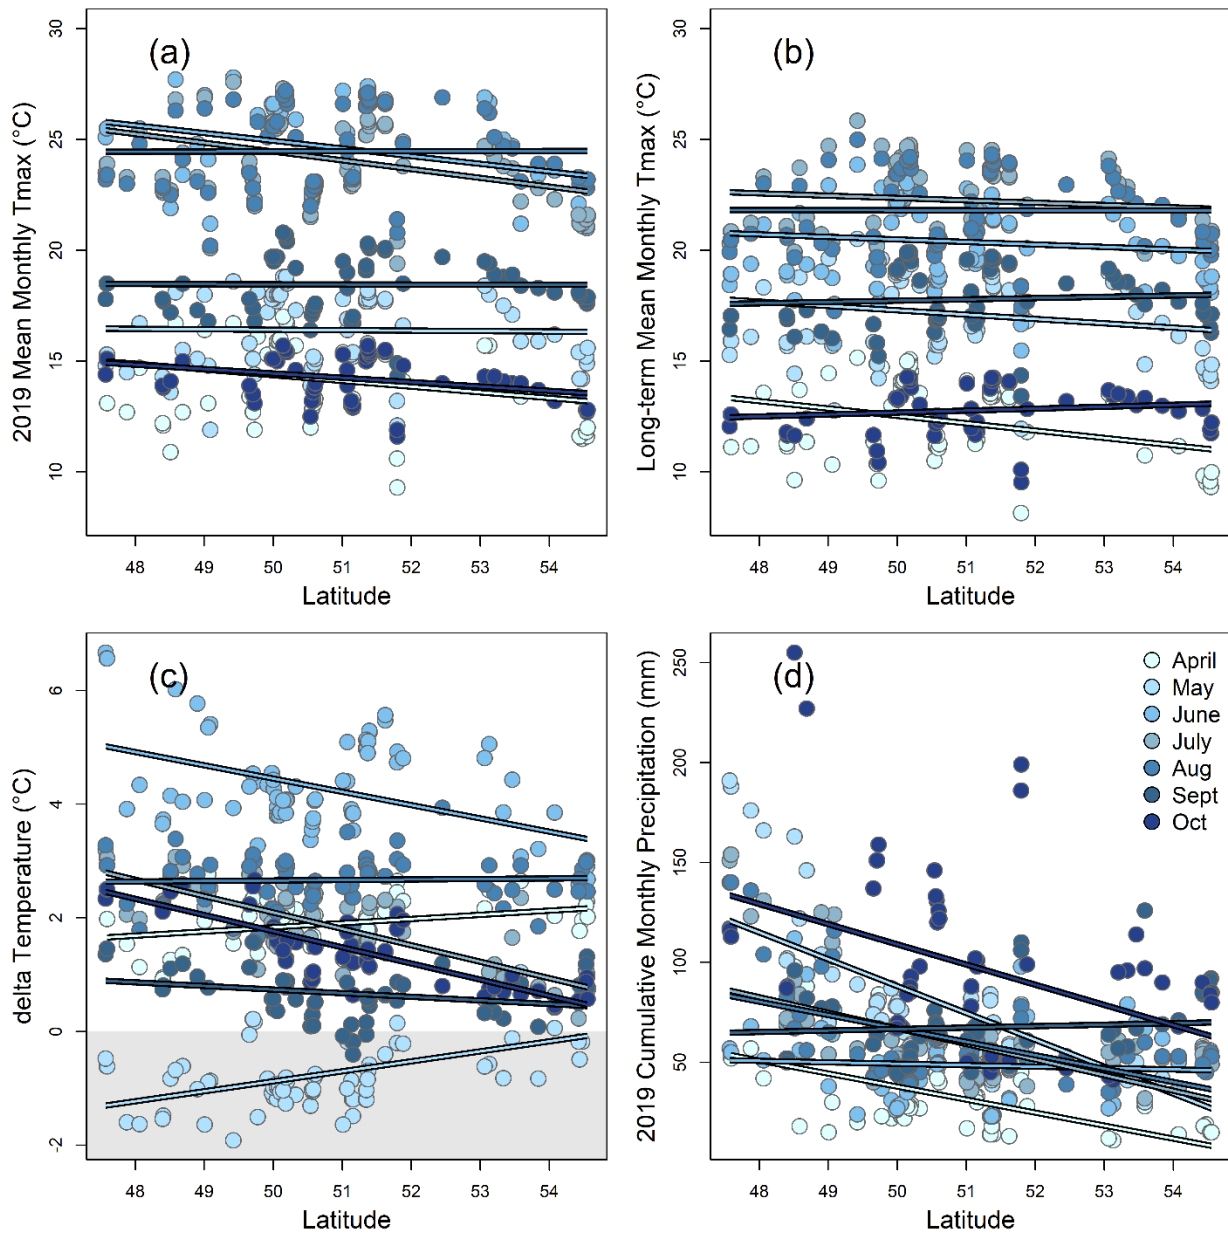

18

19 **Figure S2.** Changes with latitude across our 84 trap locations in 2019 mean monthly maximum  
20 temperature (a), the 1960-2018 long-term average monthly maximum temperature (b), the  
21 change in 2019 mean monthly maximum temperature minus the 1960-2018 long-term average  
22 (c), and 2019 cumulative monthly precipitation (d). Each point represents one month at one  
23 location, and only month/location combinations from which flying insect biomass data were  
24 collected are included. Averaging across April to October, 2019 mean monthly maximum  
25 temperature showed a weak trend to decrease with latitude (a;  $F_{1,82} = 2.7$ ,  $R^2 = 0.03$ ,  $P = 0.10$ ),  
26 while the 1960-2018 long-term average monthly maximum temperature did not vary with  
27 latitude (b;  $F_{1,82} = 0.6$ ,  $R^2 < 0.01$ ,  $P = 0.44$ ). While varying with month, the average  $\Delta$  °C of 2019  
28 maximum temperature over the long-term average decreased with latitude (c;  $F_{1,82} = 12.6$ ,  $R^2 =$   
29  $0.13$ ,  $P < 0.001$ ), as did cumulative monthly precipitation (d;  $F_{1,82} = 26.8$ ,  $R^2 = 0.24$ ,  $P < 0.001$ ).

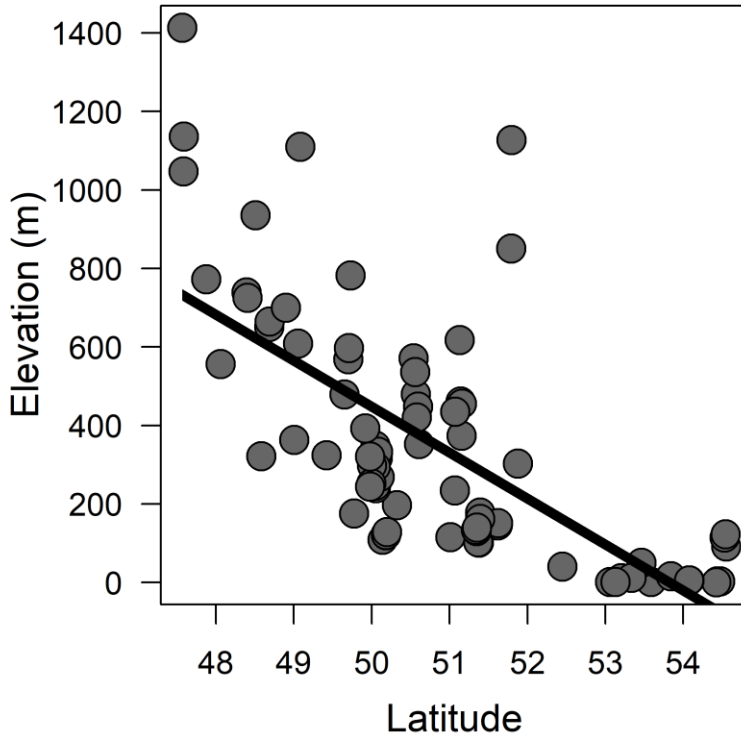

30

31 **Figure S3.** Elevation declined with increasing latitude across our 84 trap locations ( $F_{1,82} = 74.5$ ,  
32  $R^2 = 0.48$ ,  $P < 0.001$ ).

33

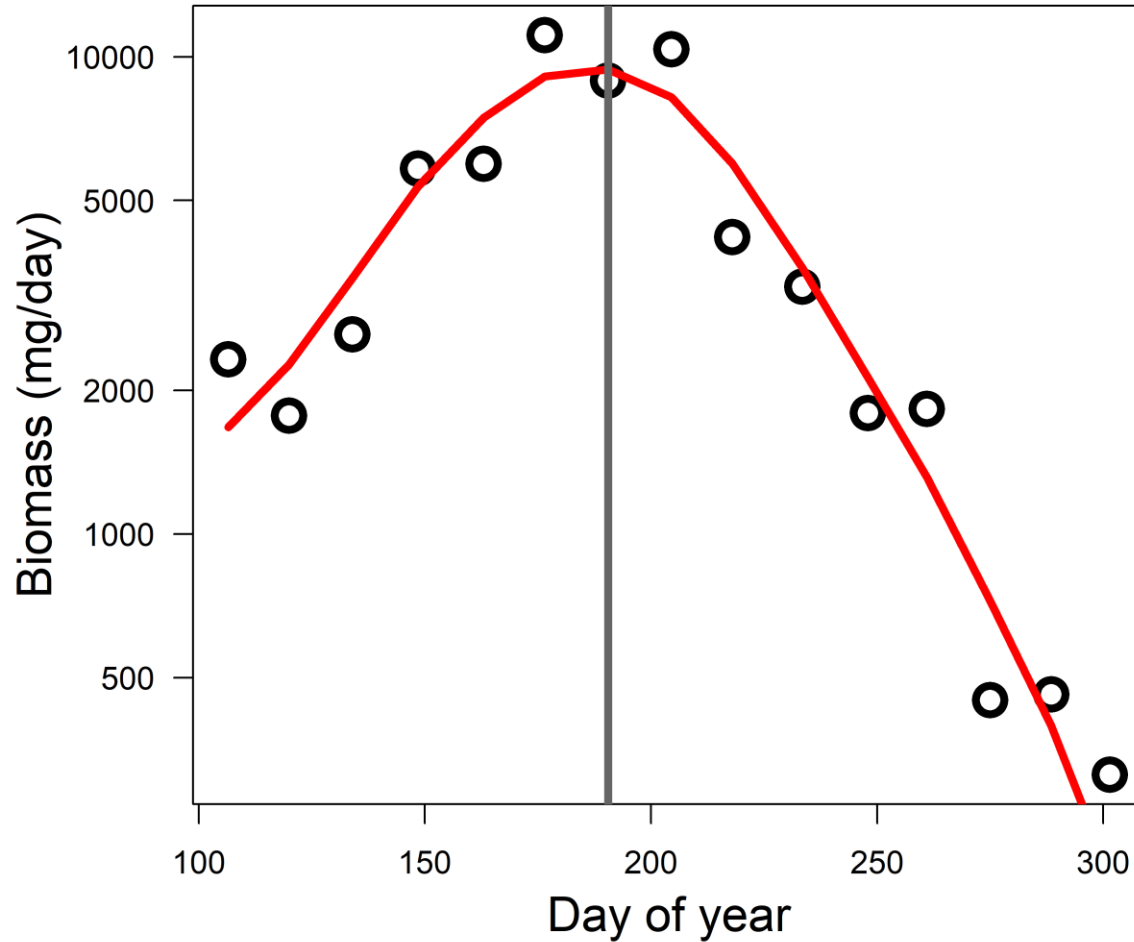

34

35 **Figure S4. Example of determination of peak biomass day from a trap at Hunsrück-**  
36 **Hochwald National Park.** Points represent the biomass (mg/day) collected from each sample  
37 plotted over the median day of the year of the sample. The red line is a spline fitted to these  
38 points. The grey vertical line show the maximum value of the spline, at which the day of year  
39 was extracted. At this site, 2019 peak biomass was estimated to occur at the 190.5<sup>th</sup> day of the  
40 year (July 9<sup>th</sup>-10<sup>th</sup>).

41



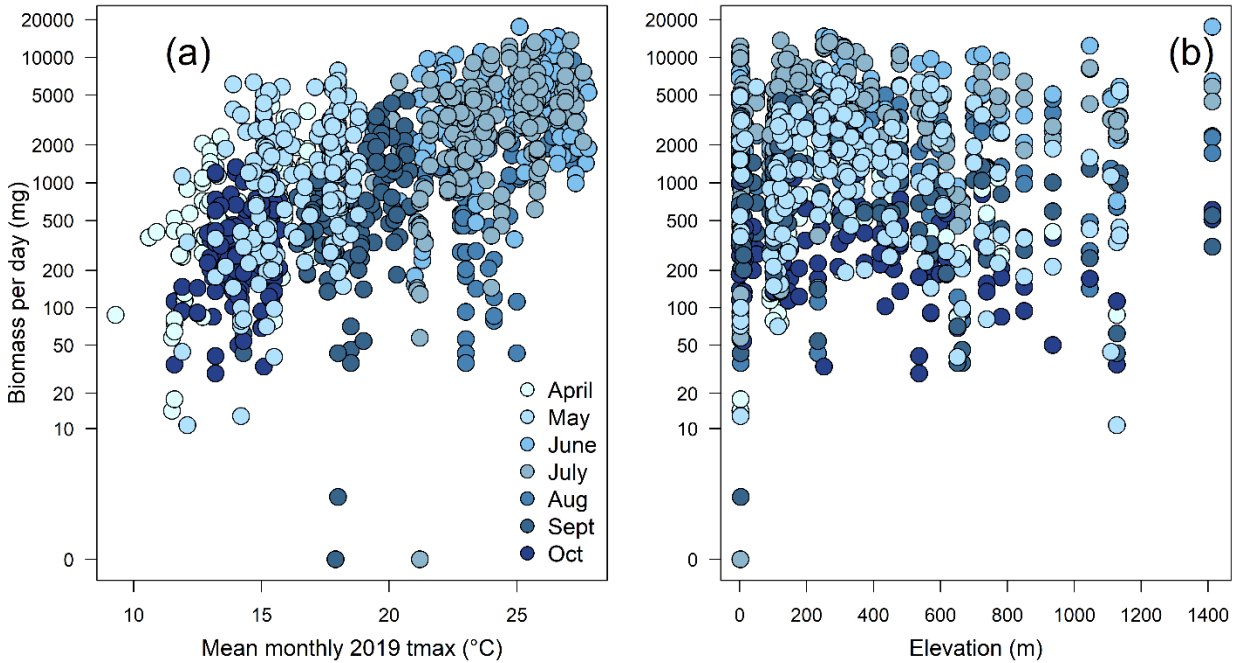

42

43 **Figure S5. Responses of flying insect biomass to tmax and elevation.** Each point represents  
44 the biomass from one sample. Across all months and site combinations, flying insect biomass  
45 increased with mean monthly 2019 maximum temperature (a), and increased weakly with  
46 elevation (b). Model estimates are provided in Table 1.
